# Supplementary material for: A efficient protocol for the synthesis of thioamides in [DBUH][OAc] at room temperature
Source: Royal Society of Chemistry journal article supplement (doi:10.1039/c7ra11259a), 2017-12-20

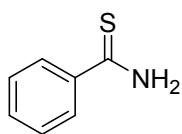

$^1\text{H}$  NMR (500 MHz,  $\text{DMSO-}d_6$ )  $\delta$  9.87 (s, 1H), 9.50 (s, 1H), 7.88-7.90 (m, 2H), 7.54-7.47 (m, 1H), 7.45 – 7.38 (m, 2H).  $^{13}\text{C}$  NMR (126 MHz,  $\text{DMSO-}d_6$ )  $\delta$  200.67, 139.96, 131.58, 128.36, 127.73.

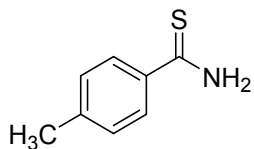

$^1\text{H}$  NMR (500 MHz,  $\text{DMSO-}d_6$ )  $\delta$  9.76 (s, 1H), 9.40 (s, 1H), 7.83 (d,  $J = 7.7$  Hz, 2H), 7.22 (d,  $J = 7.7$  Hz, 2H), 2.33 (s, 3H).  $^{13}\text{C}$  NMR (126 MHz,  $\text{DMSO-}d_6$ )  $\delta$  200.15, 141.73, 136.99, 128.87, 127.87, 21.35.

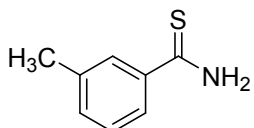

$^1\text{H}$  NMR (500 MHz,  $\text{CDCl}_3$ )  $\delta$  8.02 (s, 1H), 7.61 (s, 1H), 7.52 (d,  $J = 7.6$  Hz, 1H), 7.31 (s, 1H), 7.23-7.16 (m, 2H), 2.29 (s, 3H).  $^{13}\text{C}$  NMR (126 MHz,  $\text{CDCl}_3$ )  $\delta$  201.92, 138.06, 137.36, 131.80, 127.32, 126.90, 122.73, 20.30.

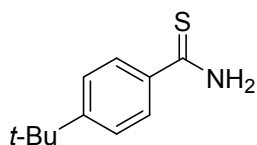

$^1\text{H}$  NMR (600 MHz,  $\text{DMSO-}d_6$ )  $\delta$  9.77 (s, 1H), 9.42 (s, 1H), 7.84 (d,  $J = 8.6$  Hz, 2H), 7.43 (d,  $J = 8.6$  Hz, 2H), 1.29 (s, 9H).  $^{13}\text{C}$  NMR (151 MHz,  $\text{DMSO-}d_6$ )  $\delta$  200.32, 154.52, 137.21, 127.66, 125.13, 35.05, 31.36.

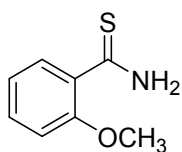

$^1\text{H}$  NMR (500 MHz,  $\text{DMSO-}d_6$ )  $\delta$  9.95 (s, 1H), 9.31 (s, 1H), 7.70 (dd,  $J = 7.7, 1.8$  Hz, 1H), 7.40-7.36 (m, 1H), 7.05 (d,  $J = 8.2$  Hz, 1H), 6.96 (t,  $J = 7.5$  Hz, 1H), 3.81 (s, 3H).  $^{13}\text{C}$  NMR (126 MHz,  $\text{DMSO-}d_6$ )  $\delta$  199.34, 154.80, 131.63, 131.48, 130.67, 120.42, 112.11, 56.15.

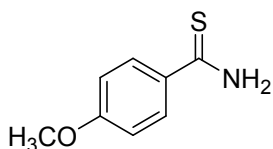

$^1\text{H}$  NMR (500 MHz,  $\text{DMSO-}d_6$ )  $\delta$  9.64 (s, 1H), 9.32 (s, 1H), 7.96 (d,  $J = 8.7$  Hz, 2H), 6.95 (d,  $J = 8.7$  Hz, 2H), 3.81 (s, 3H).  $^{13}\text{C}$  NMR (126 MHz,  $\text{DMSO-}d_6$ )  $\delta$  199.06, 162.36, 131.80, 129.92, 113.50, 55.91.

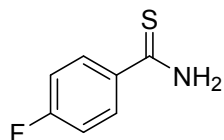

$^1\text{H NMR}$  (500 MHz,  $\text{DMSO-}d_6$ )  $\delta$  9.89 (s, 1H), 9.52 (s, 1H), 8.10 -7.96 (m, 2H), 7.28- 7.23 (m, 2H).

$^{13}\text{C NMR}$  (126 MHz,  $\text{DMSO-}d_6$ )  $\delta$  199.04, 164.40 (d,  $J = 249.4$  Hz), 136.31 (d,  $J = 2.9$  Hz), 130.39 (d,  $J = 9.0$  Hz), 115.20 (d,  $J = 21.8$  Hz).

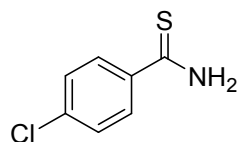

$^1\text{H NMR}$  (500 MHz,  $\text{DMSO-}d_6$ )  $\delta$  9.95 (s, 1H), 9.57 (s, 1H), 7.91 (d,  $J = 8.7$  Hz, 2H), 7.65 – 7.42 (m, 2H).  $^{13}\text{C NMR}$  (126 MHz,  $\text{DMSO-}d_6$ )  $\delta$  199.09, 138.56, 136.50, 129.58, 128.38.

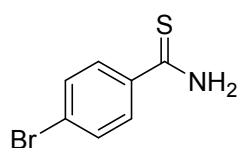

$^1\text{H NMR}$  (500 MHz,  $\text{DMSO-}d_6$ )  $\delta$  9.93 (s, 1H), 9.55 (s, 1H), 7.82 (d,  $J = 8.5$  Hz, 2H), 7.63 - 7.61 (m, 2H).  $^{13}\text{C NMR}$  (126 MHz,  $\text{DMSO-}d_6$ )  $\delta$  204.01, 143.73, 136.07, 134.55, 134.49, 130.17.

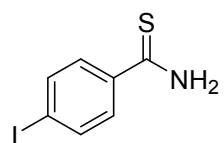

$^1\text{H NMR}$  (500 MHz,  $\text{DMSO-}d_6$ )  $\delta$  9.92 (s, 1H), 9.55 (s, 1H), 7.80 (d,  $J = 8.3$  Hz, 2H), 7.66 (d,  $J = 8.2$  Hz, 2H).  $^{13}\text{C NMR}$  (126 MHz,  $\text{DMSO-}d_6$ )  $\delta$  199.52, 139.28, 137.21, 129.64, 99.36.

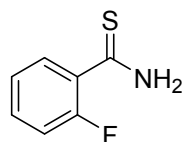

$^1\text{H NMR}$  (500 MHz,  $\text{DMSO-}d_6$ )  $\delta$  10.14 (s, 1H), 9.58 (s, 1H), 7.62-7.58 (m, 1H), 7.49 – 7.38 (m, 1H), 7.28 – 7.17 (m, 2H).  $^{13}\text{C NMR}$  (126 MHz,  $\text{DMSO-}d_6$ )  $\delta$  196.85, 156.87 (d,  $J = 248.6$  Hz), 131.87 (d,  $J = 8.3$  Hz), 130.98, 130.80, 124.60 (d,  $J = 3.4$  Hz), 116.21 (d,  $J = 22.0$  Hz).

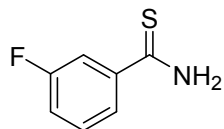

$^1\text{H NMR}$  (500 MHz,  $\text{DMSO-}d_6$ )  $\delta$  10.02 (s, 1H), 9.59 (s, 1H), 7.75-7.73 (m, 1H), 7.70 - 7.65 (m, 1H), 7.50-7.45 (m, 1H), 7.40 - 7.33 (m, 1H).  $^{13}\text{C NMR}$  (126 MHz,  $\text{DMSO-}d_6$ )  $\delta$  198.84, 161.89 (d,  $J = 243.8$  Hz), 142.07 (d,  $J = 7.1$  Hz), 130.47 (d,  $J = 8.2$  Hz), 123.88 (d,  $J = 2.6$  Hz), 118.28 (d,  $J = 21.2$  Hz), 114.53 (d,  $J = 23.4$  Hz).

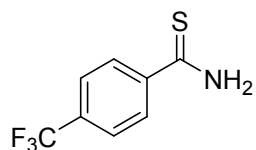

$^1\text{H}$  NMR (500 MHz,  $\text{DMSO-}d_6$ )  $\delta$  10.13 (s, 1H), 9.73 (s, 1H), 8.02 (d,  $J = 8.2$  Hz, 2H), 7.79 (d,  $J = 8.2$  Hz, 2H).  $^{13}\text{C}$  NMR (126 MHz,  $\text{DMSO-}d_6$ )  $\delta$  199.43, 143.84, 131.13 (q,  $J = 31.9$  Hz), 128.38, 125.42 (q,  $J = 3.7$  Hz), 124.43. (q,  $J = 272.7$  Hz).

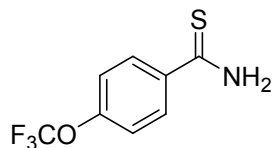

$^1\text{H}$  NMR (500 MHz,  $\text{DMSO-}d_6$ )  $\delta$  10.00 (s, 1H), 9.61 (s, 1H), 7.99 (d,  $J = 8.8$  Hz, 1H), 7.41 (d,  $J = 8.2$  Hz, 2H), 3.35 (s, 3H).  $^{13}\text{C}$  NMR (126 MHz,  $\text{DMSO-}d_6$ )  $\delta$  199.08, 150.59, 139.10, 129.91, 120.63, 120.42 (q,  $J = 257.1$  Hz).

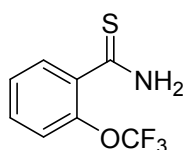

$^1\text{H}$  NMR (500 MHz,  $\text{DMSO-}d_6$ )  $\delta$  10.14 (s, 1H), 9.63 (s, 1H), 7.57 – 7.46 (m, 2H), 7.43 – 7.34 (m, 2H).  $^{13}\text{C}$  NMR (126 MHz,  $\text{DMSO-}d_6$ )  $\delta$  197.80, 142.97, 137.12, 130.95, 130.01, 127.59, 121.25, 120.54 (q,  $J = 257.2$  Hz).

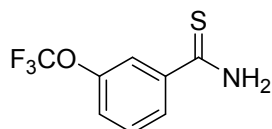

$^1\text{H}$  NMR (500 MHz,  $\text{DMSO-}d_6$ )  $\delta$  10.09 (s, 1H), 9.68 (s, 1H), 8.09 – 7.78 (m, 2H), 7.66 – 7.42 (m, 2H).  $^{13}\text{C}$  NMR (126 MHz,  $\text{DMSO-}d_6$ )  $\delta$  198.50, 148.25, 148.24, 141.94, 130.52, 126.42, 123.84, 120.46, 120.52 (q,  $J = 256.9$  Hz).

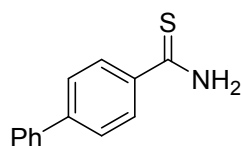

$^1\text{H}$  NMR (500 MHz,  $\text{DMSO-}d_6$ )  $\delta$  9.90 (s, 1H), 9.55 (s, 1H), 8.02 (d,  $J = 8.4$  Hz, 2H), 7.73 (d,  $J = 8.3$  Hz, 4H), 7.50 (t,  $J = 7.6$  Hz, 2H), 7.41 (t,  $J = 7.3$  Hz, 1H).  $^{13}\text{C}$  NMR (126 MHz,  $\text{DMSO-}d_6$ )  $\delta$  199.86, 143.14, 139.51, 138.55, 129.51, 128.57, 128.51, 127.29, 126.56.

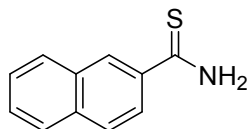

$^1\text{H}$  NMR (500 MHz,  $\text{DMSO-}d_6$ )  $\delta$  9.99 (s, 1H), 9.67 (s, 1H), 8.45 (d,  $J = 1.3$  Hz, 1H), 8.06-8.01 (m, 2H), 7.97-7.93 (m, 2H), 7.65-7.54 (m, 2H).  $^{13}\text{C}$  NMR (126 MHz,  $\text{DMSO-}d_6$ )  $\delta$  200.52, 137.22, 134.47, 132.28, 129.57, 128.17, 128.01, 127.80, 127.31, 127.11, 125.57.

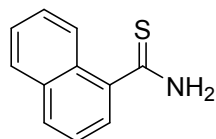

$^1\text{H}$  NMR (500 MHz,  $\text{DMSO-}d_6$ )  $\delta$  10.24 (s, 1H), 9.77 (s, 1H), 8.12 (d,  $J = 8.0$  Hz, 1H), 7.96-7.91 (m, 2H), 7.57-7.43 (m, 3H), 7.44 (dd,  $J = 7.1, 1.2$  Hz, 1H).  $^{13}\text{C}$  NMR (126 MHz,  $\text{DMSO-}d_6$ )  $\delta$  202.93, 142.09, 133.45, 128.90, 128.70, 128.52, 126.95, 126.62, 125.58, 125.55, 123.71.

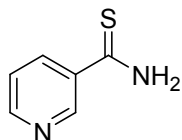

$^1\text{H}$  NMR (500 MHz,  $\text{DMSO-}d_6$ )  $\delta$  10.08 (s, 1H), 9.72 (s, 1H), 9.02 (s, 1H), 8.67 (d,  $J = 4.7$  Hz, 1H), 8.20 (d,  $J = 8.0$  Hz, 1H), 7.45-7.47 (m, 1H).  $^{13}\text{C}$  NMR (126 MHz,  $\text{DMSO-}d_6$ )  $\delta$  198.32, 152.02, 148.07, 135.63, 135.29, 123.45.

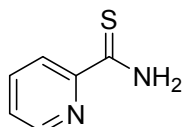

$^1\text{H}$  NMR (500 MHz,  $\text{DMSO-}d_6$ )  $\delta$  10.17 (s, 1H), 9.94 (s, 1H), 8.61-8.60 (m, 1H), 8.52 (d,  $J = 7.9$  Hz, 1H), 7.98 (td,  $J = 7.8, 1.8$  Hz, 1H), 7.62-7.59 (m, 1H).  $^{13}\text{C}$  NMR (126 MHz,  $\text{DMSO-}d_6$ )  $\delta$  195.16, 152.22, 148.03, 137.82, 126.78, 125.02.

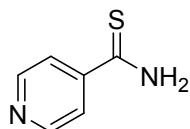

$^1\text{H}$  NMR (500 MHz,  $\text{DMSO-}d_6$ )  $\delta$  10.21 (s, 1H), 9.79 (s, 1H), 8.67-8.65 (m, 2H), 7.72-7.70 (m, 2H).  $^{13}\text{C}$  NMR (126 MHz,  $\text{DMSO-}d_6$ )  $\delta$  198.77, 150.28, 146.74, 121.29.

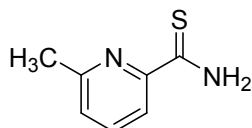

$^1\text{H}$  NMR (500 MHz,  $\text{DMSO-}d_6$ )  $\delta$  10.13 (s, 1H), 9.83 (s, 1H), 8.31 (d,  $J = 7.8$  Hz, 1H), 7.85 (t,  $J = 7.8$  Hz, 1H), 7.46 (d,  $J = 7.7$  Hz, 1H), 2.55 (s, 3H).  $^{13}\text{C}$  NMR (126 MHz,  $\text{DMSO-}d_6$ )  $\delta$  195.18, 156.66, 151.48, 137.93, 126.28, 122.06, 24.27.

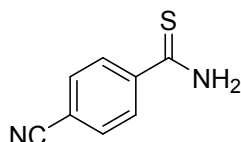

$^1\text{H}$  NMR (500 MHz,  $\text{DMSO-}d_6$ )  $\delta$  10.17 (s, 1H), 9.75 (s, 1H), 8.02 – 7.96 (m, 2H), 7.93-7.87 (m, 2H).  $^{13}\text{C}$  NMR (126 MHz,  $\text{DMSO-}d_6$ )  $\delta$  199.05, 143.88, 132.51, 128.33, 118.85, 113.56.

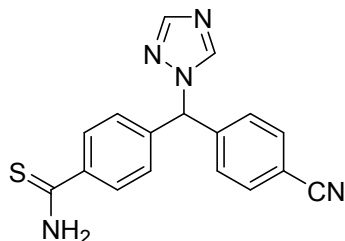

$^1\text{H}$  NMR (500 MHz,  $\text{DMSO-}d_6$ )  $\delta$  9.93 (s, 1H), 9.53 (s, 1H), 8.71 (s, 1H), 8.13 (s, 1H), 7.89-7.83 (m, 4H), 7.43 (d,  $J = 8.3$  Hz, 2H), 7.33-7.28 (m, 3H).  $^{13}\text{C}$  NMR (126 MHz,  $\text{DMSO-}d_6$ )  $\delta$  200.03, 152.74, 145.34, 144.32, 141.25, 140.05, 133.15, 129.46, 128.22, 128.11, 118.94, 111.49, 64.82.

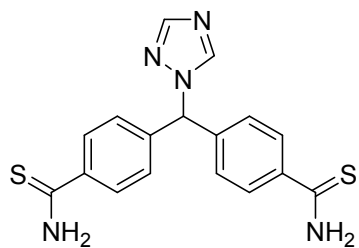

$^1\text{H}$  NMR (500 MHz,  $\text{DMSO-}d_6$ )  $\delta$  9.91 (s, 2H), 9.51 (s, 2H), 8.68 (s, 1H), 8.10 (s, 1H), 7.86 (d,  $J = 8.4$  Hz, 4H), 7.28 (d,  $J = 8.4$  Hz, 4H), 7.23 (s, 1H).  $^{13}\text{C}$  NMR (126 MHz,  $\text{DMSO-}d_6$ )  $\delta$  200.06, 152.58, 145.12, 141.87, 139.86, 128.07, 128.03, 65.04.

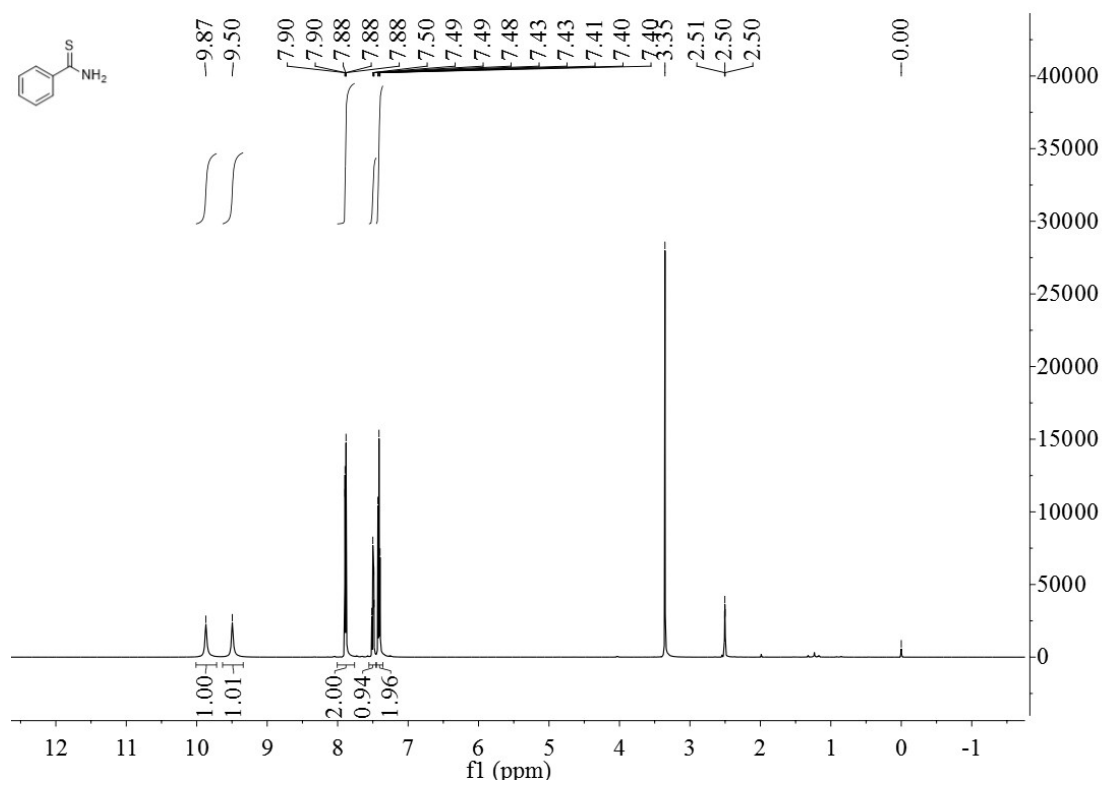

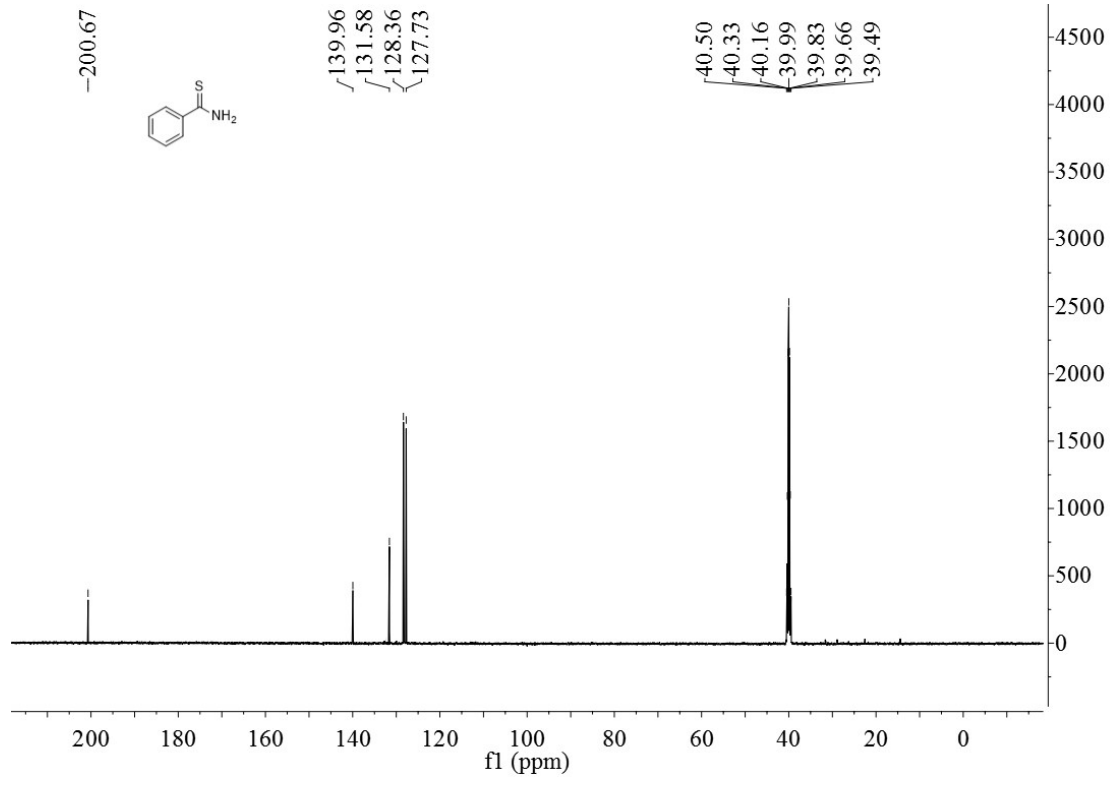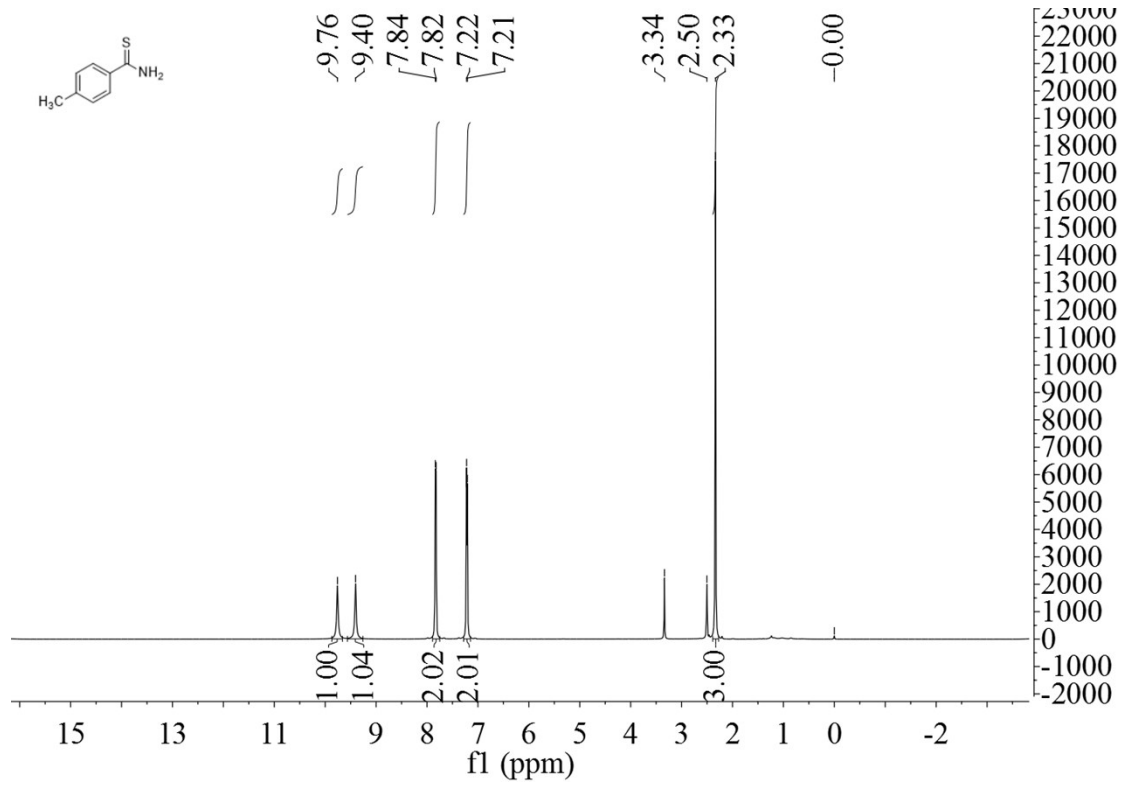

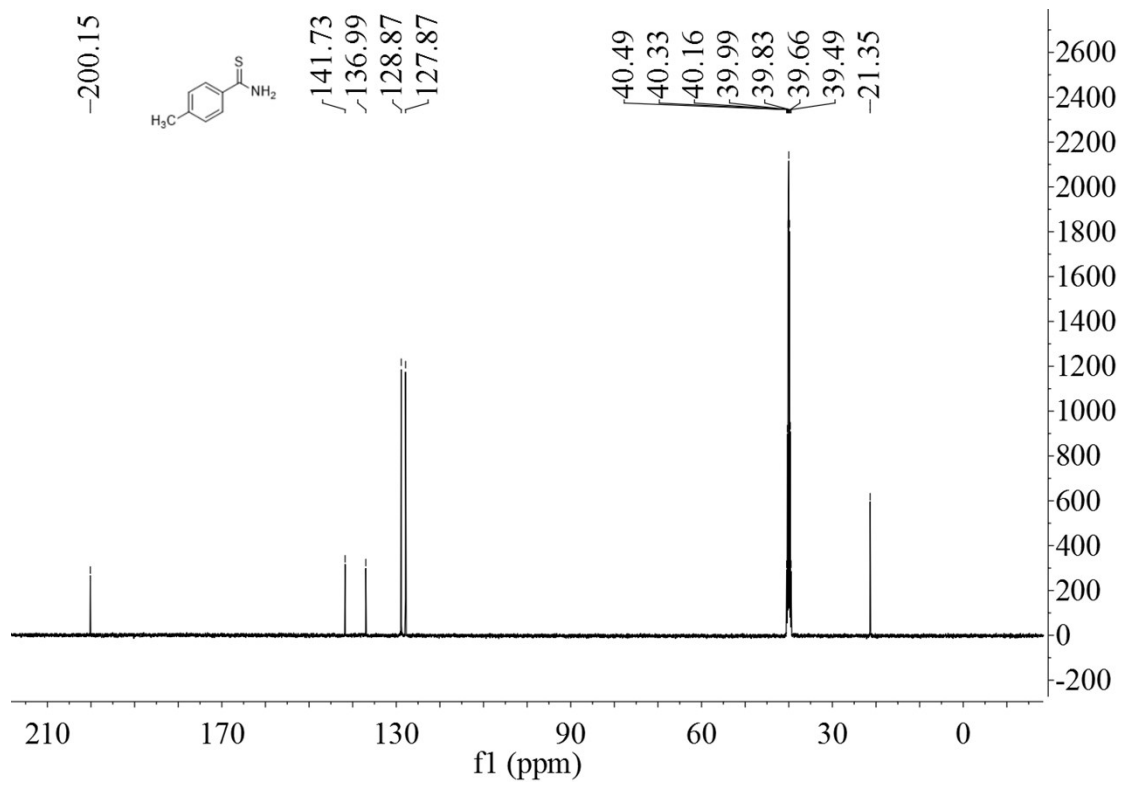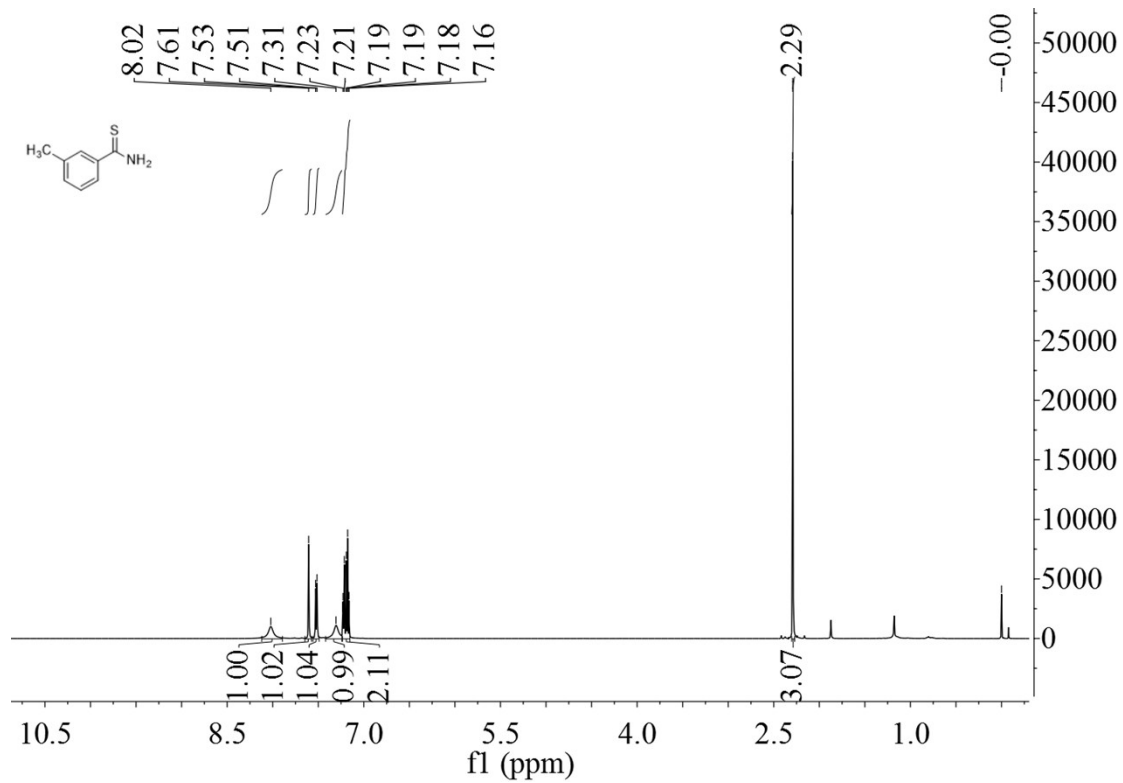

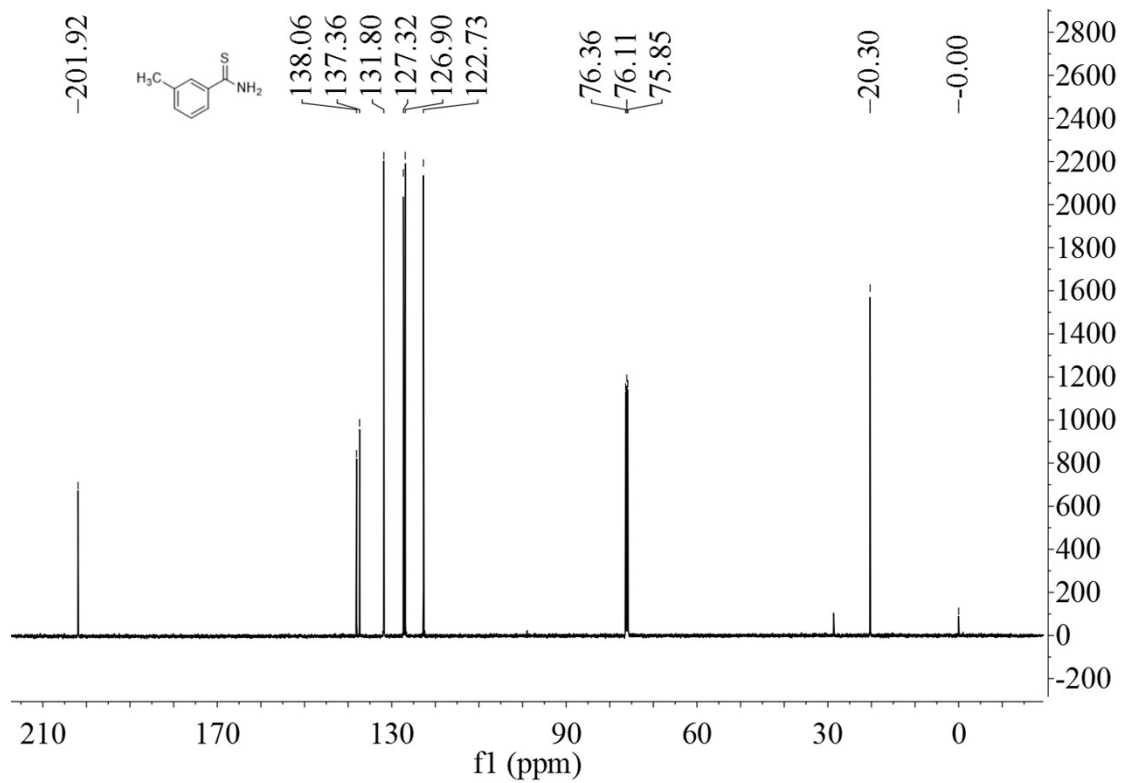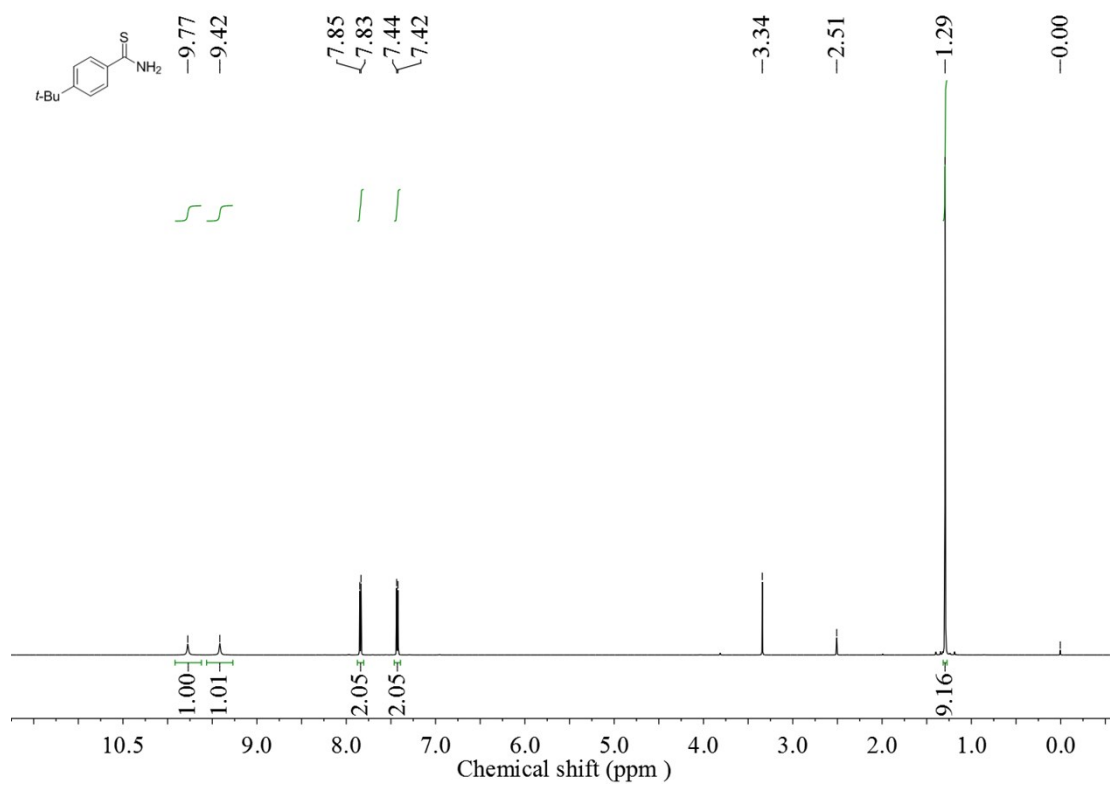



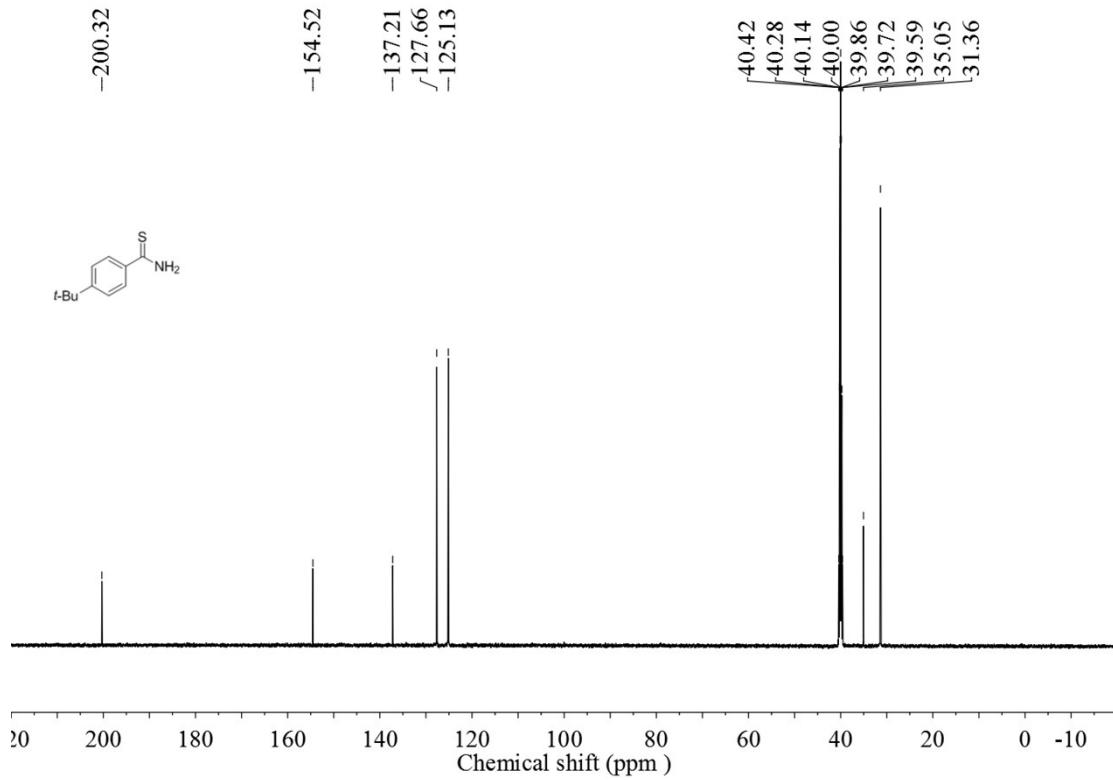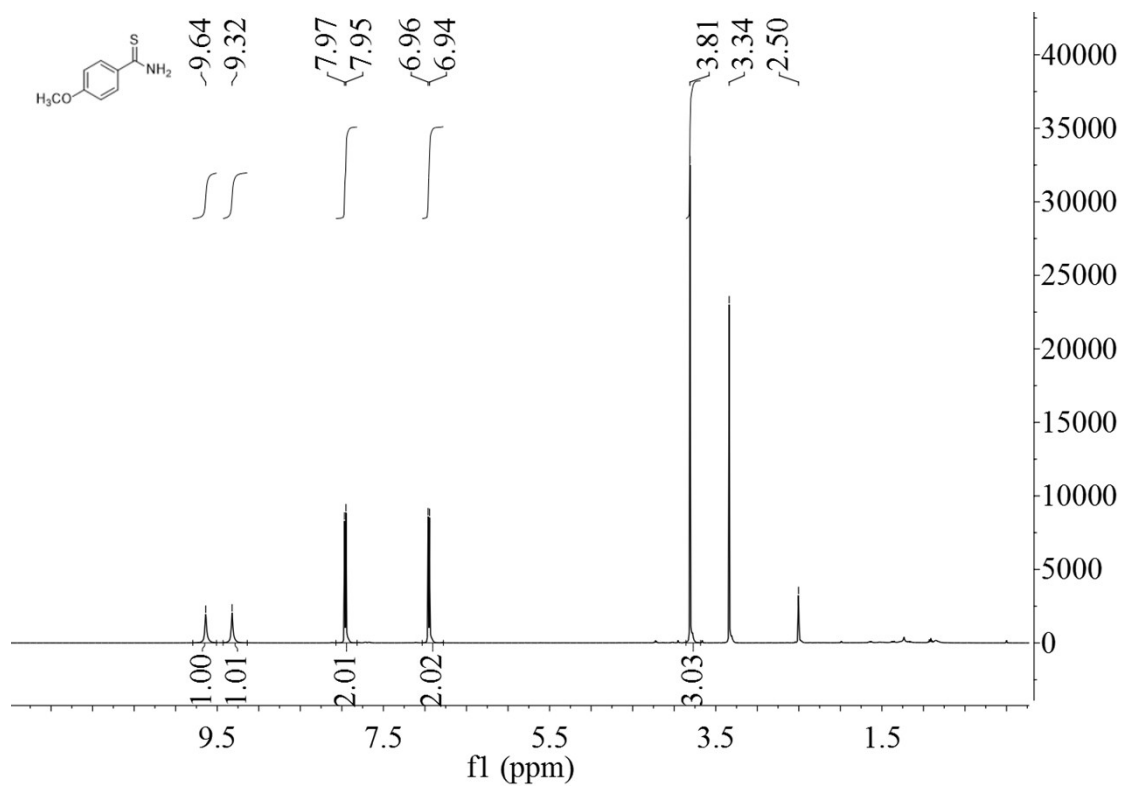

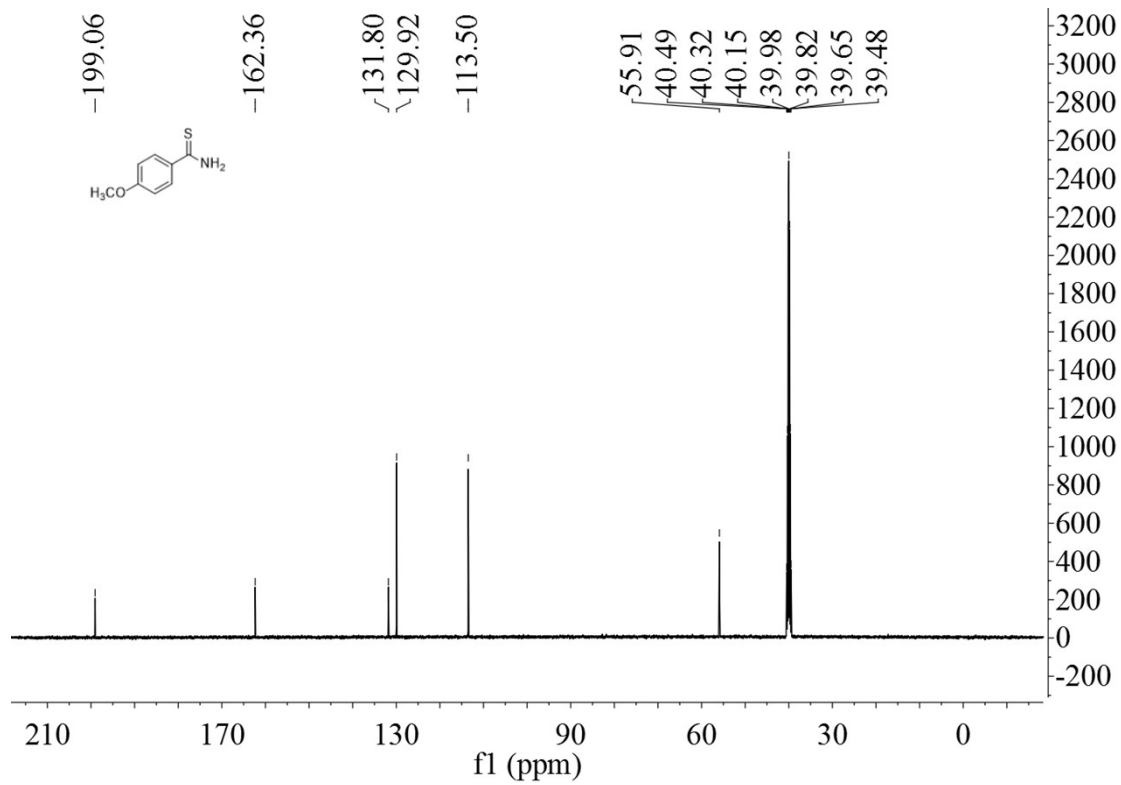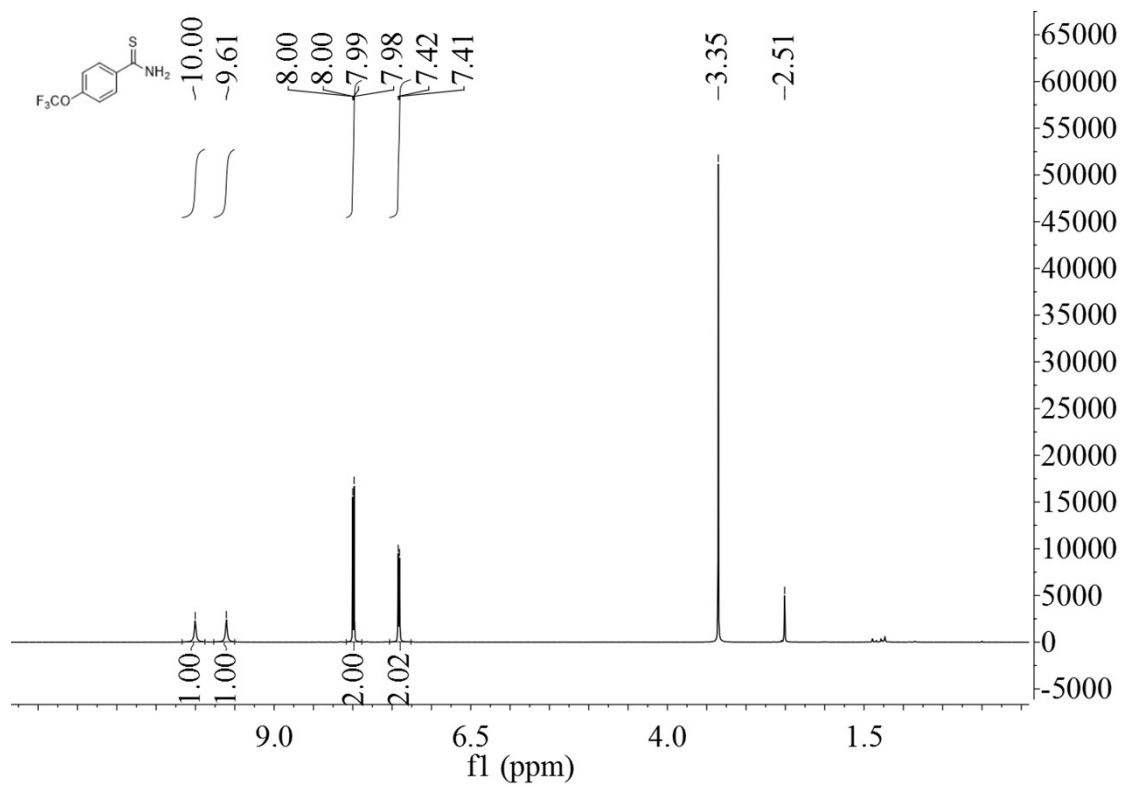

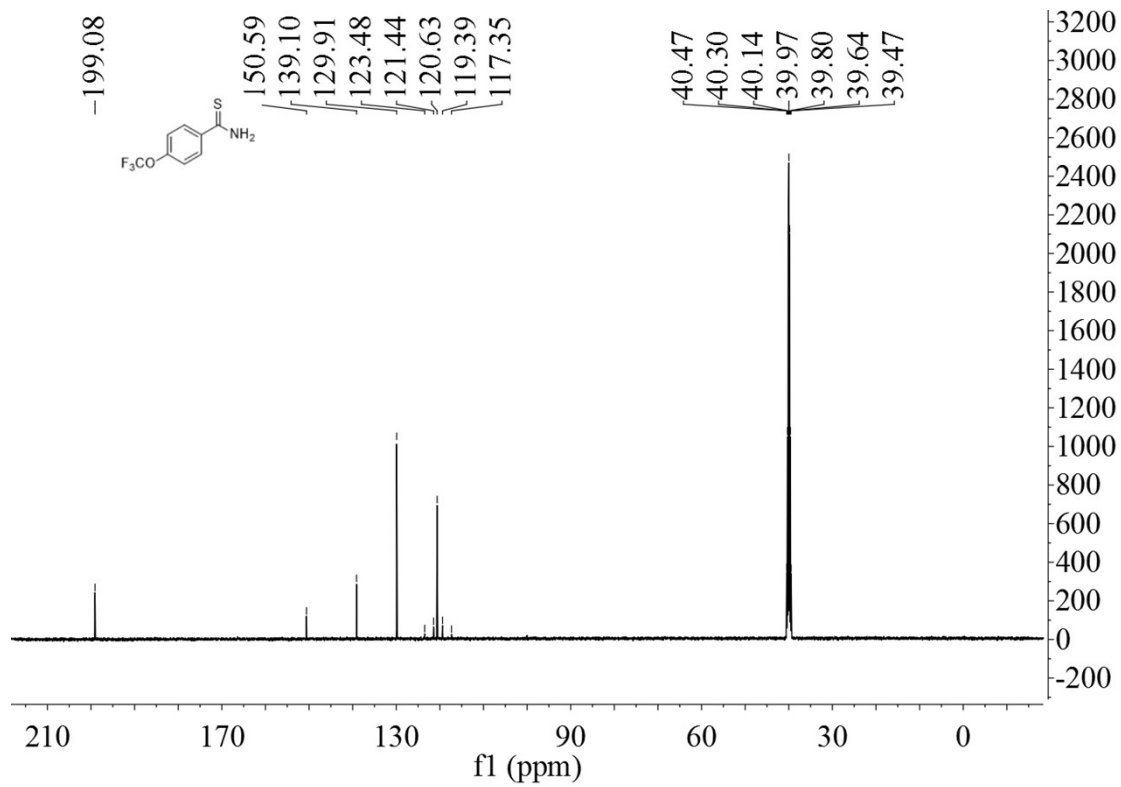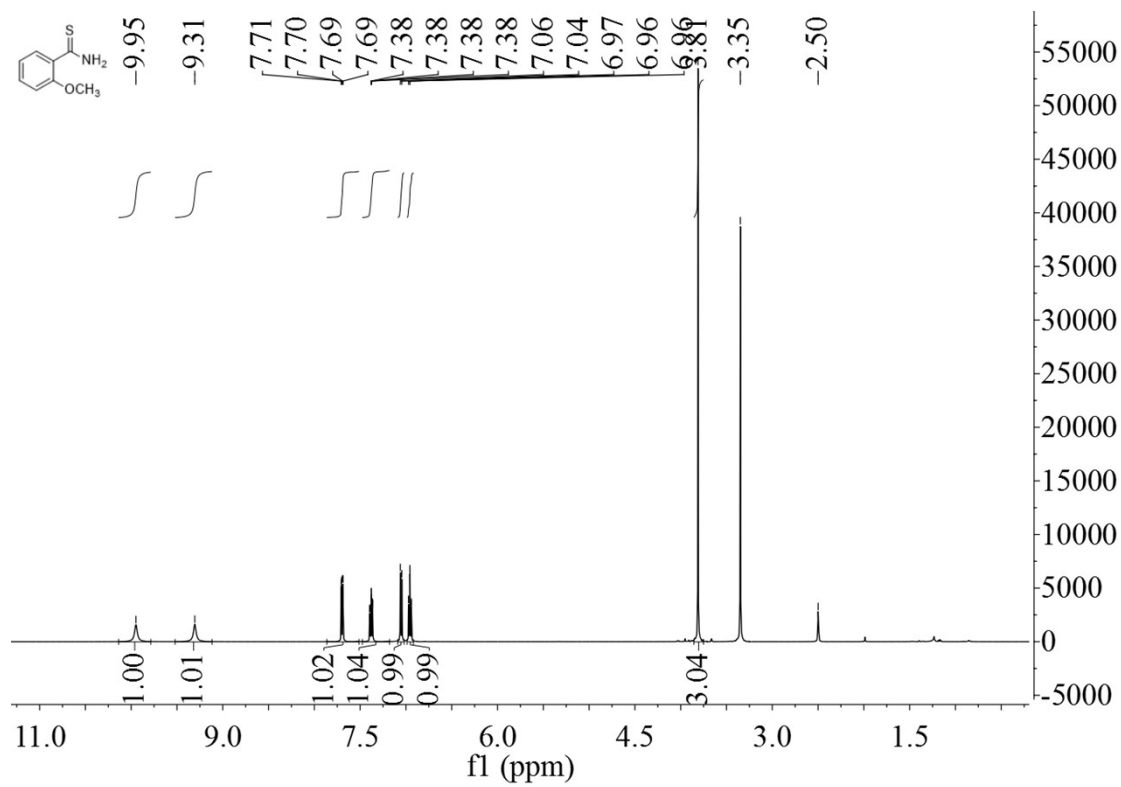

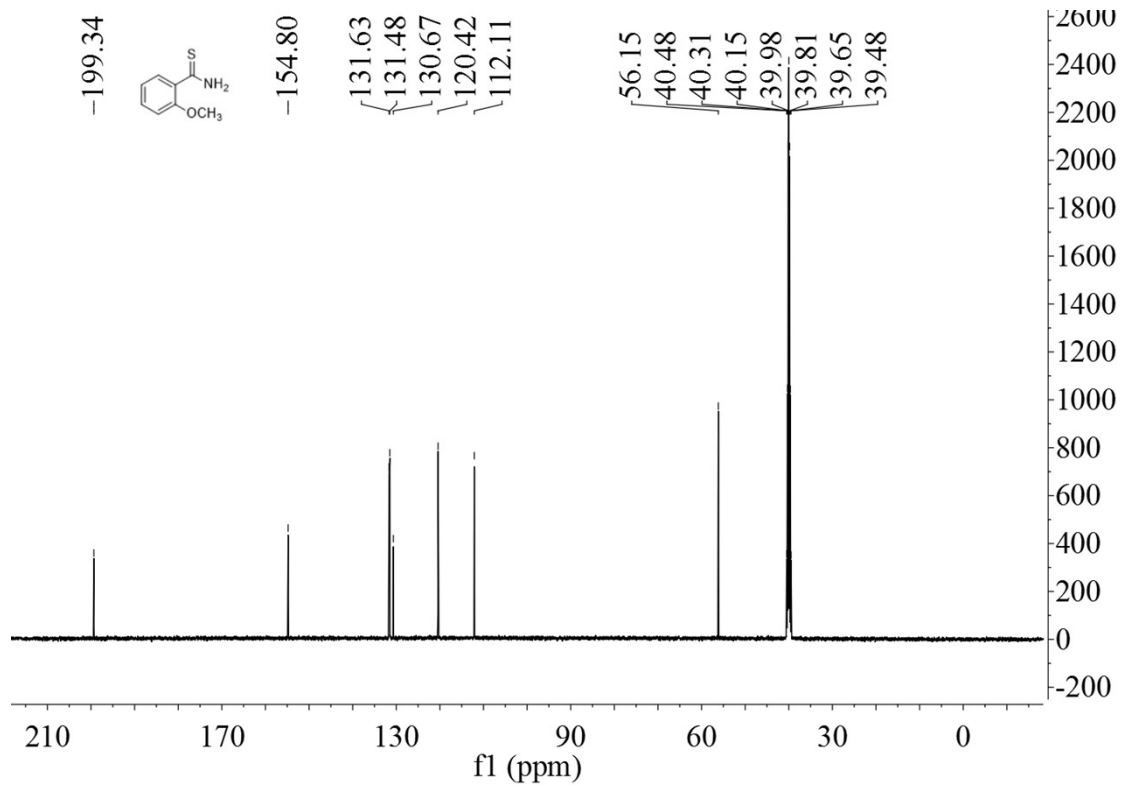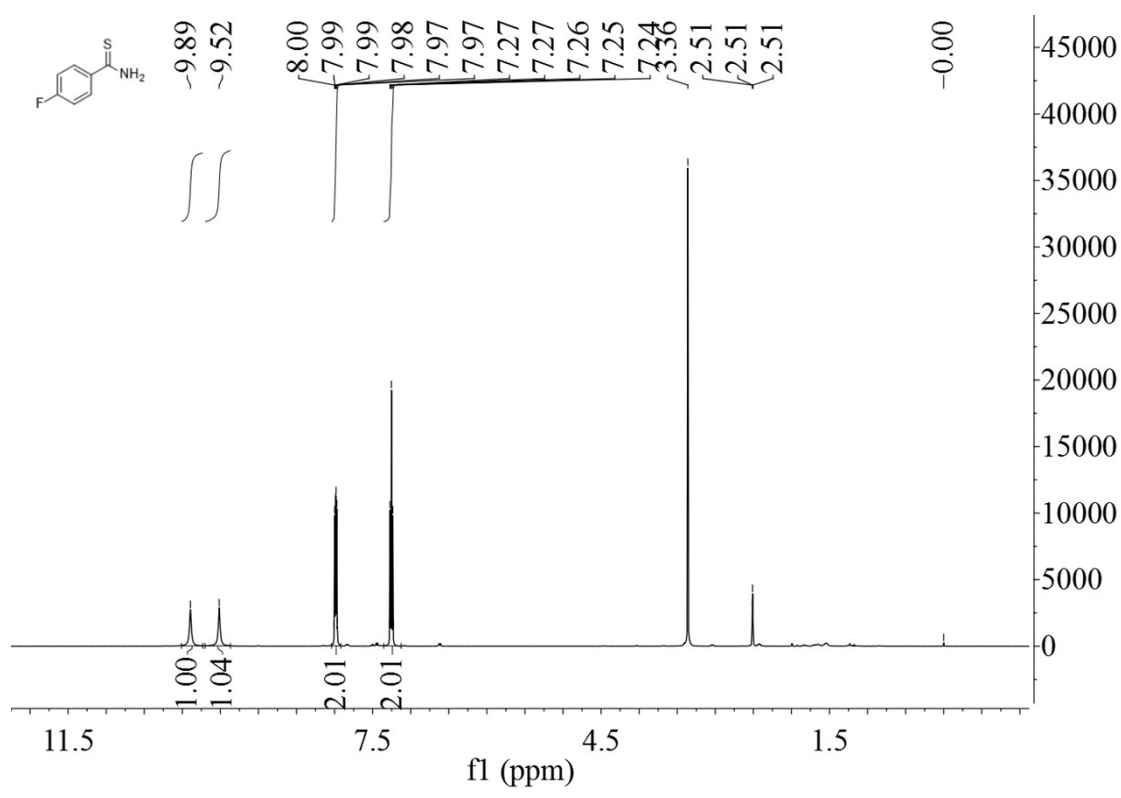

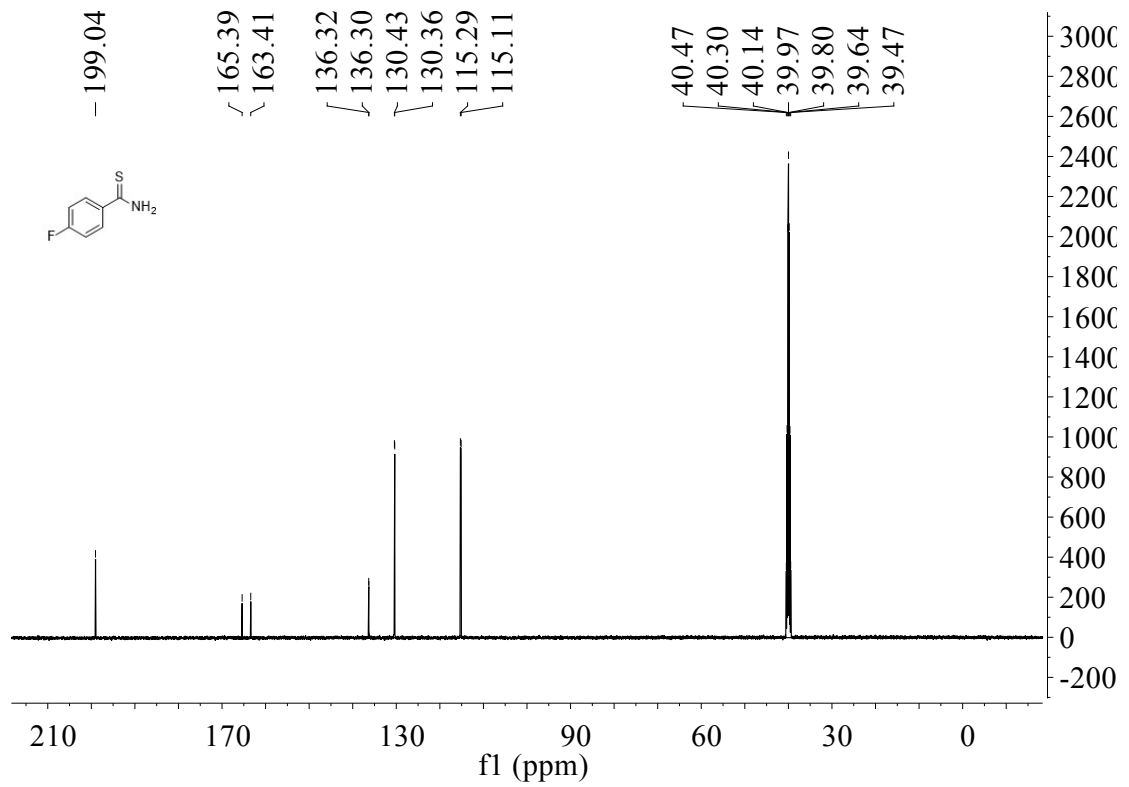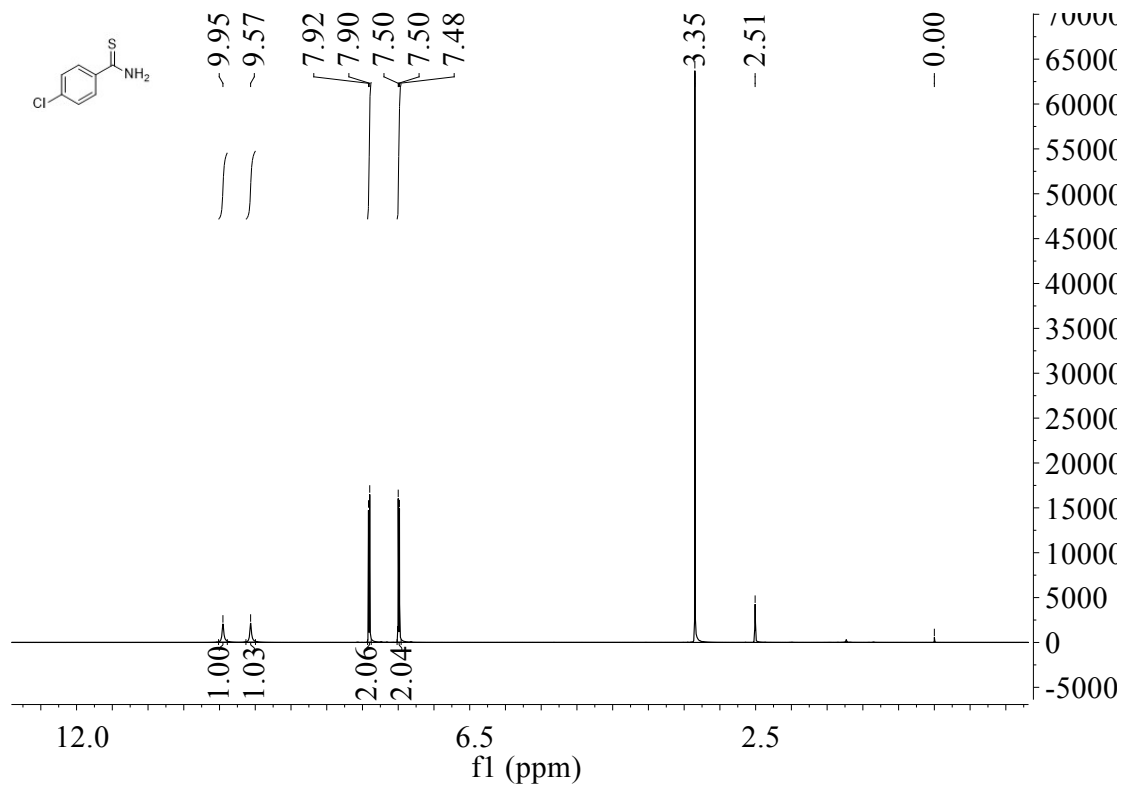

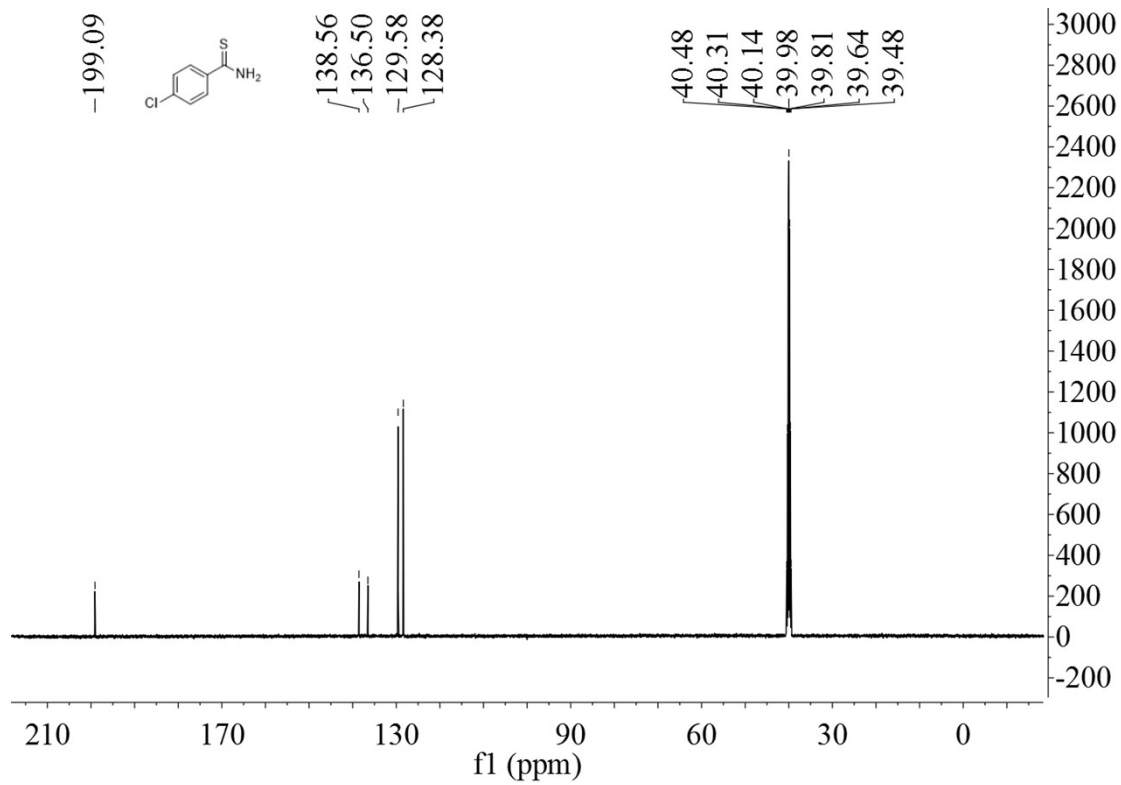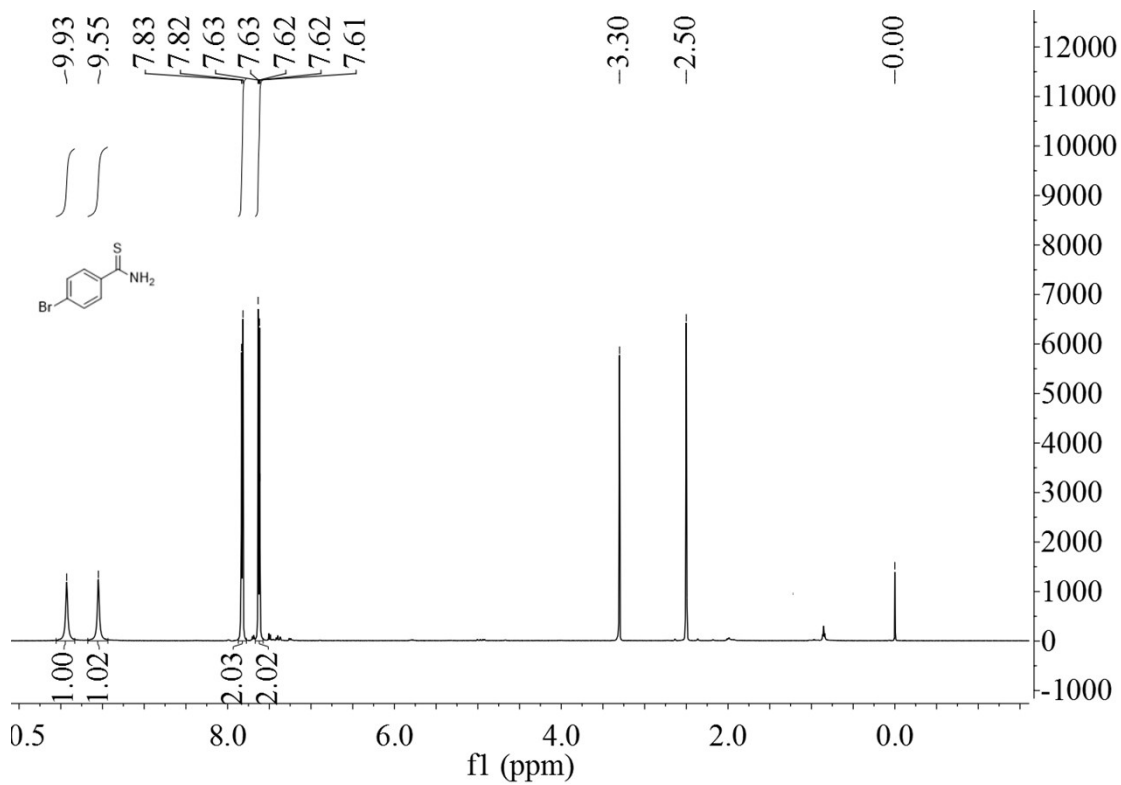

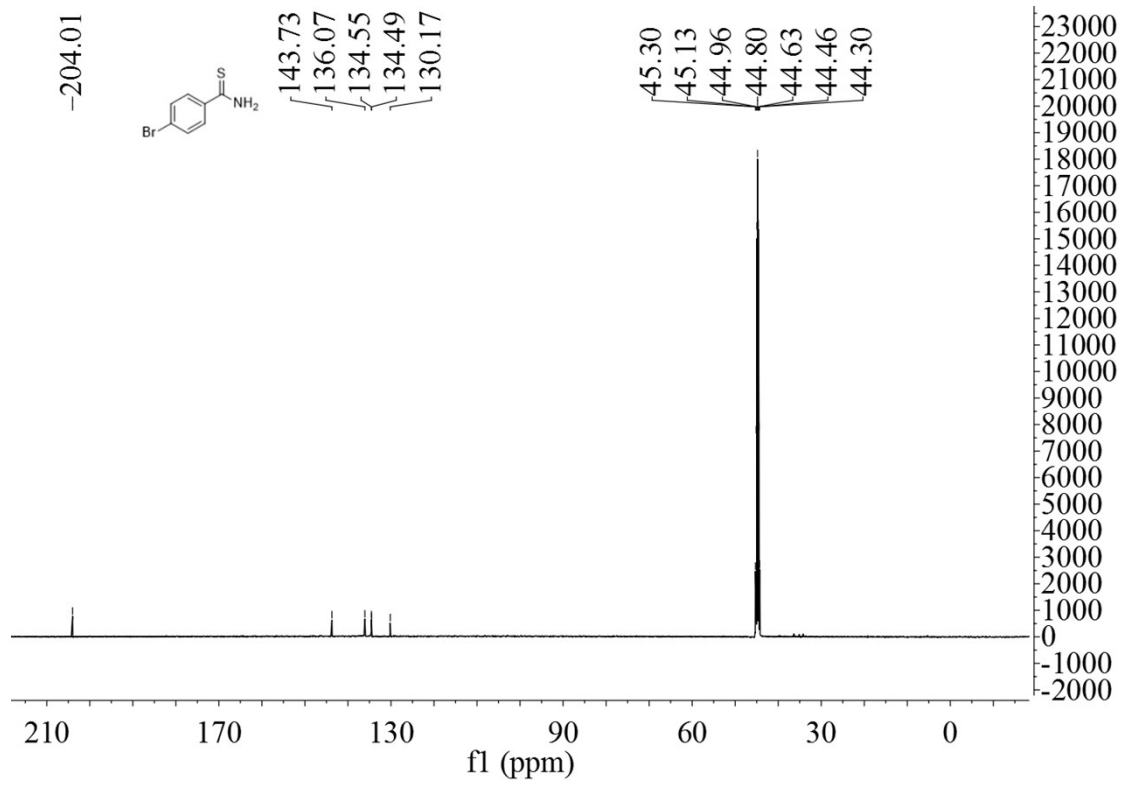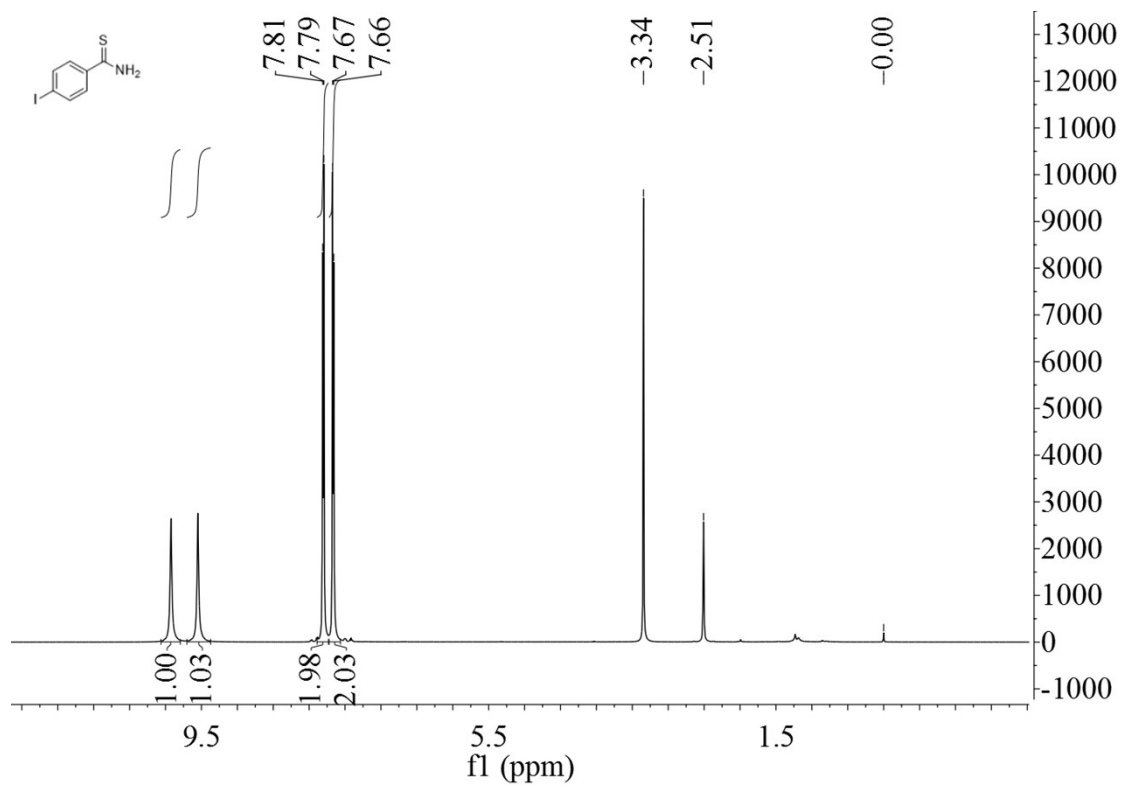

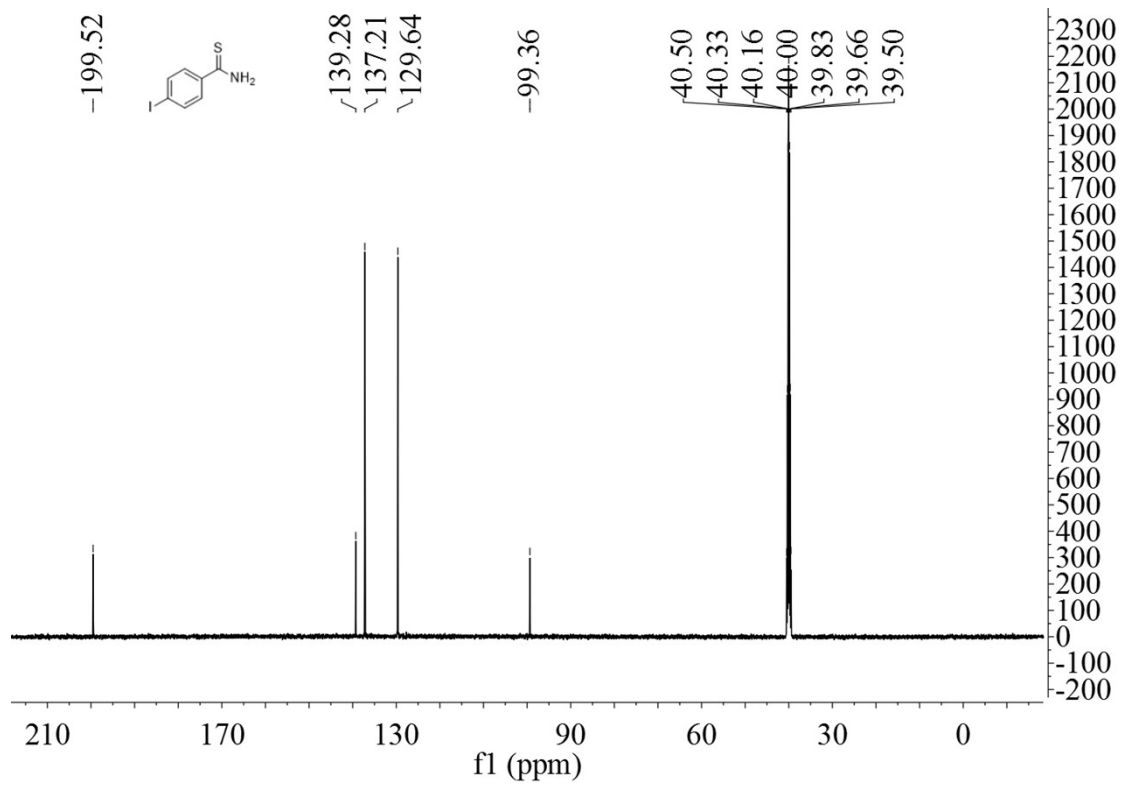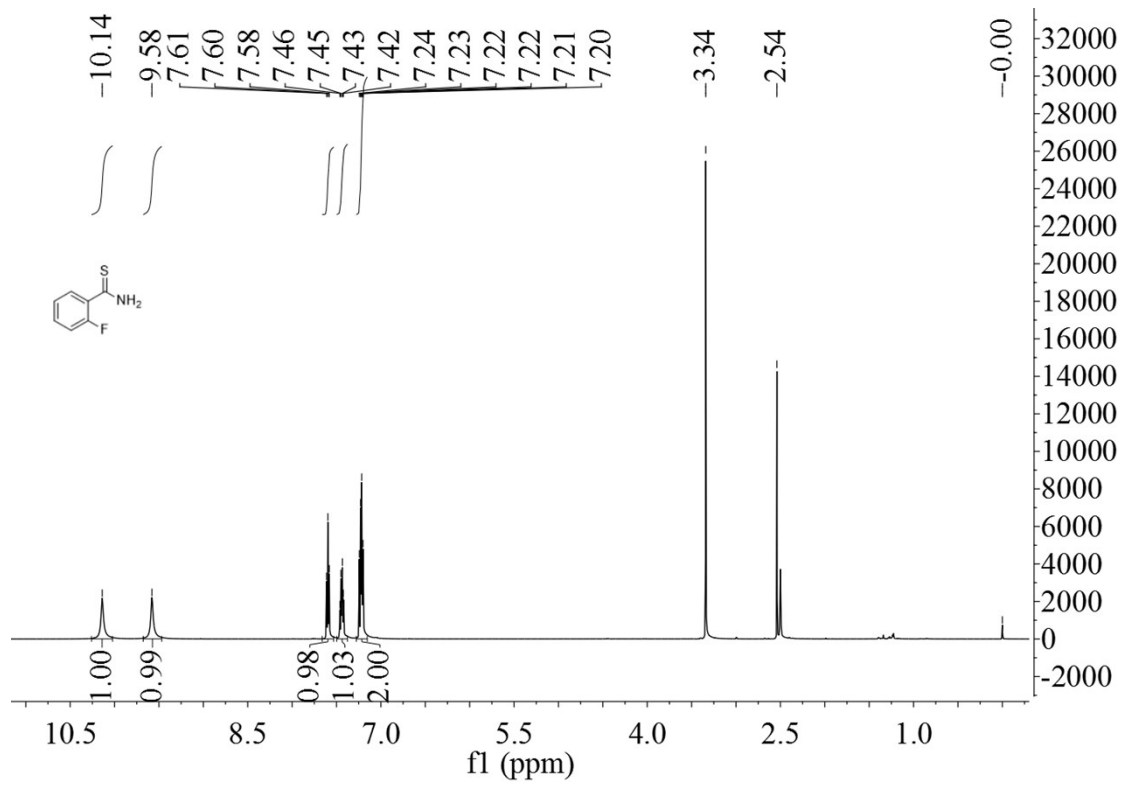



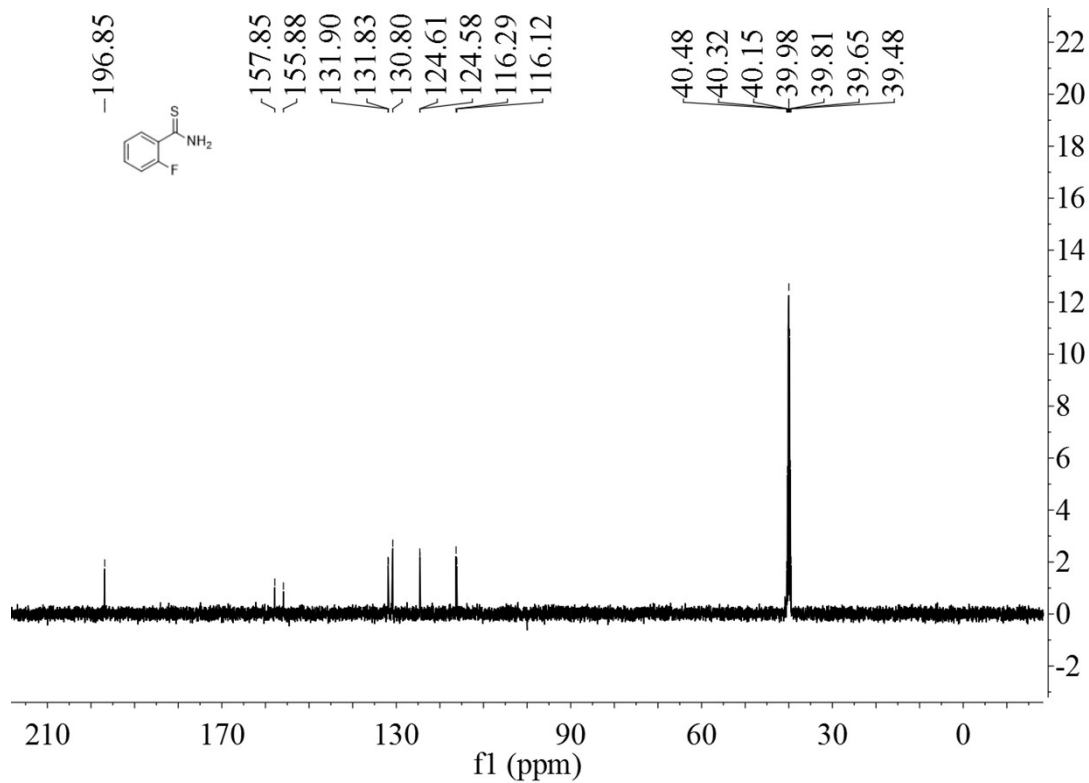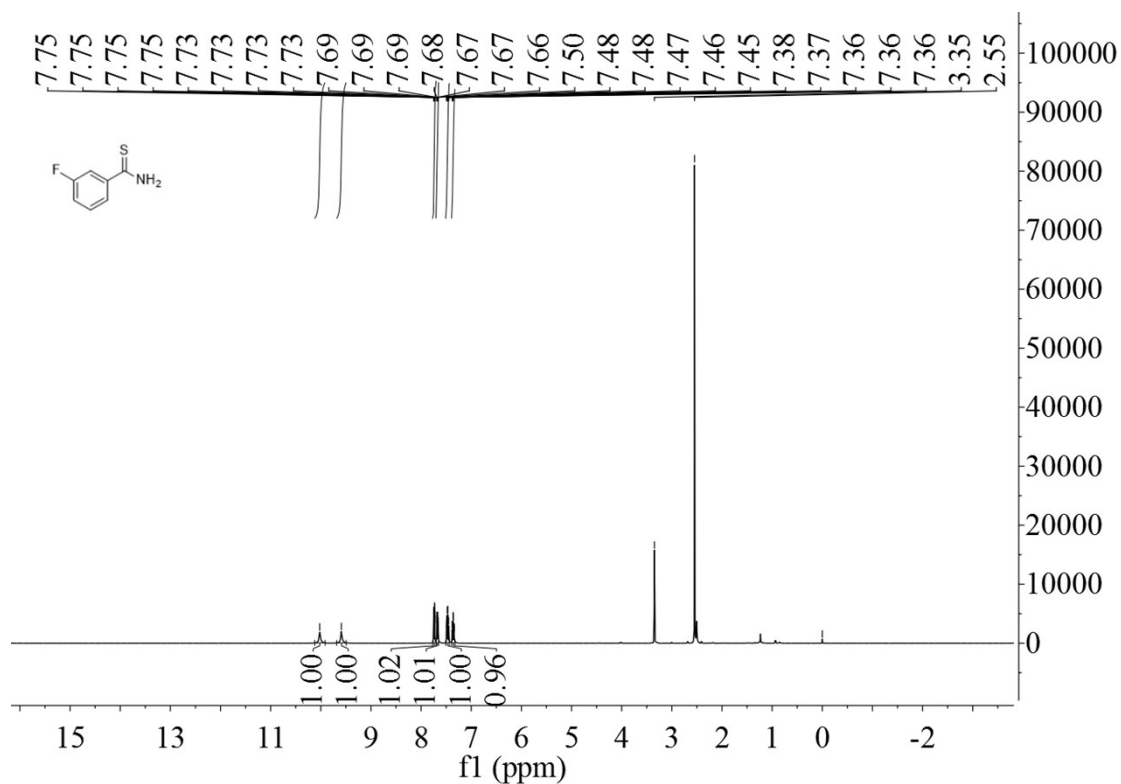

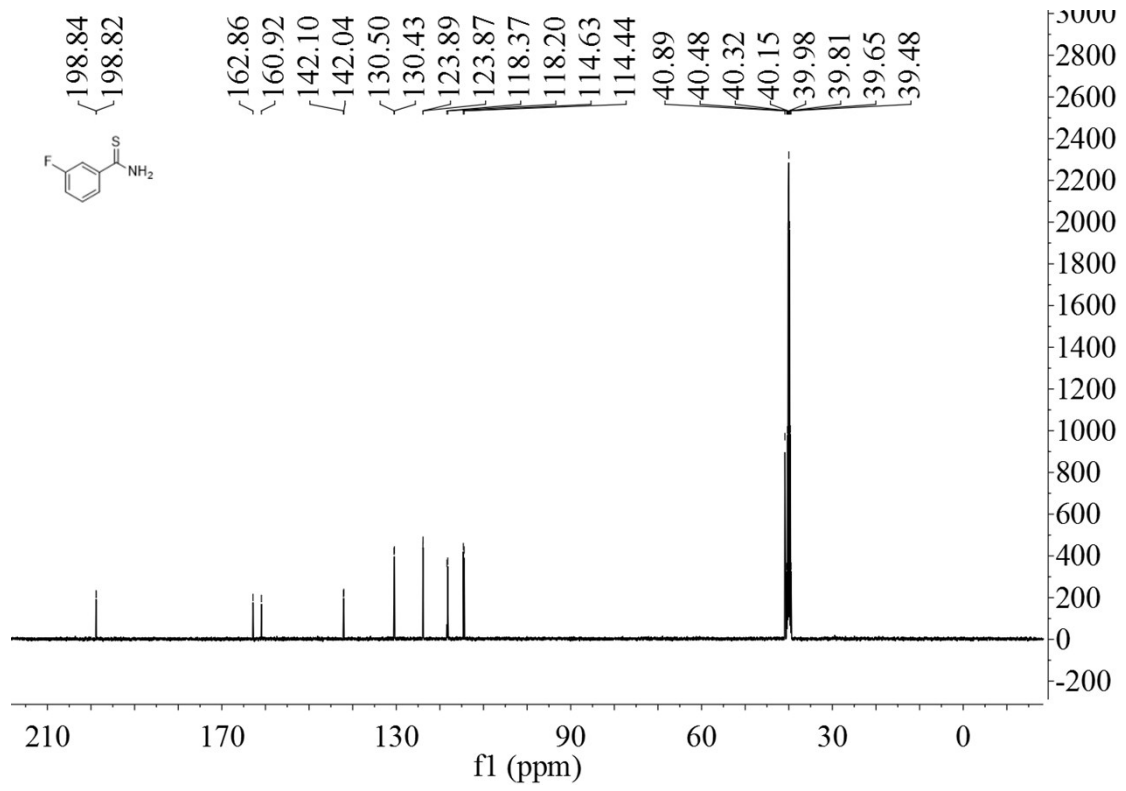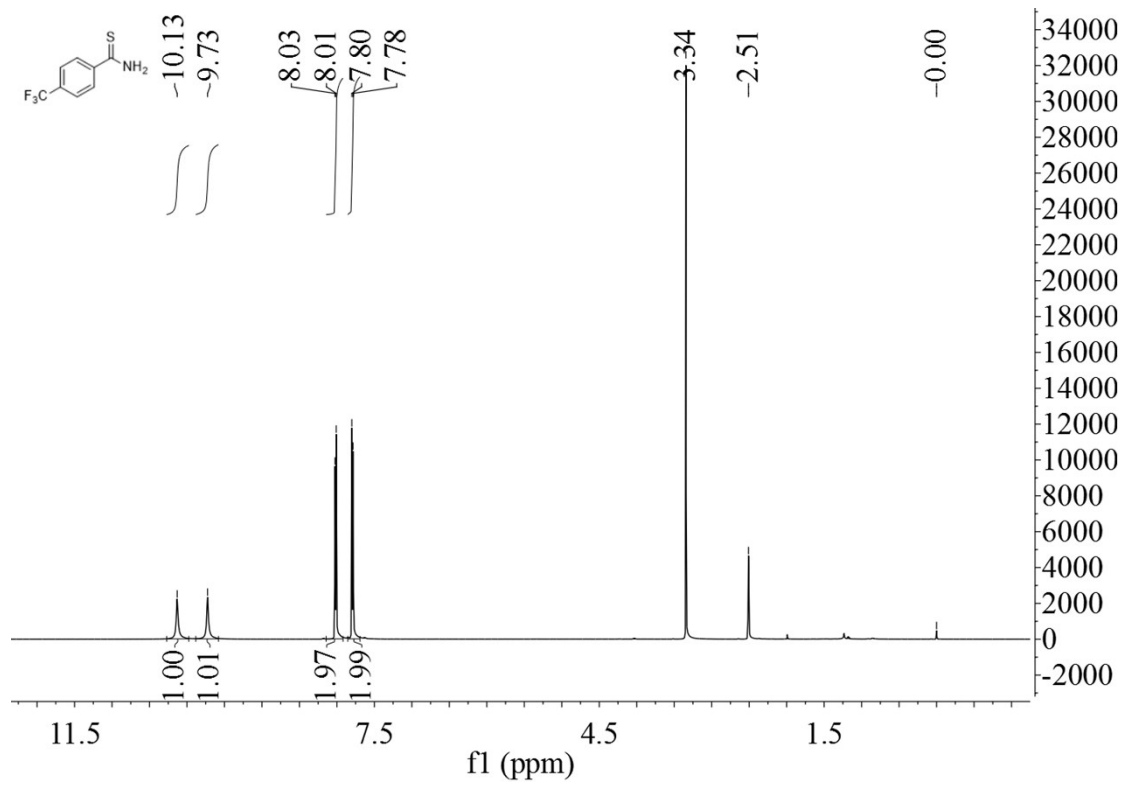

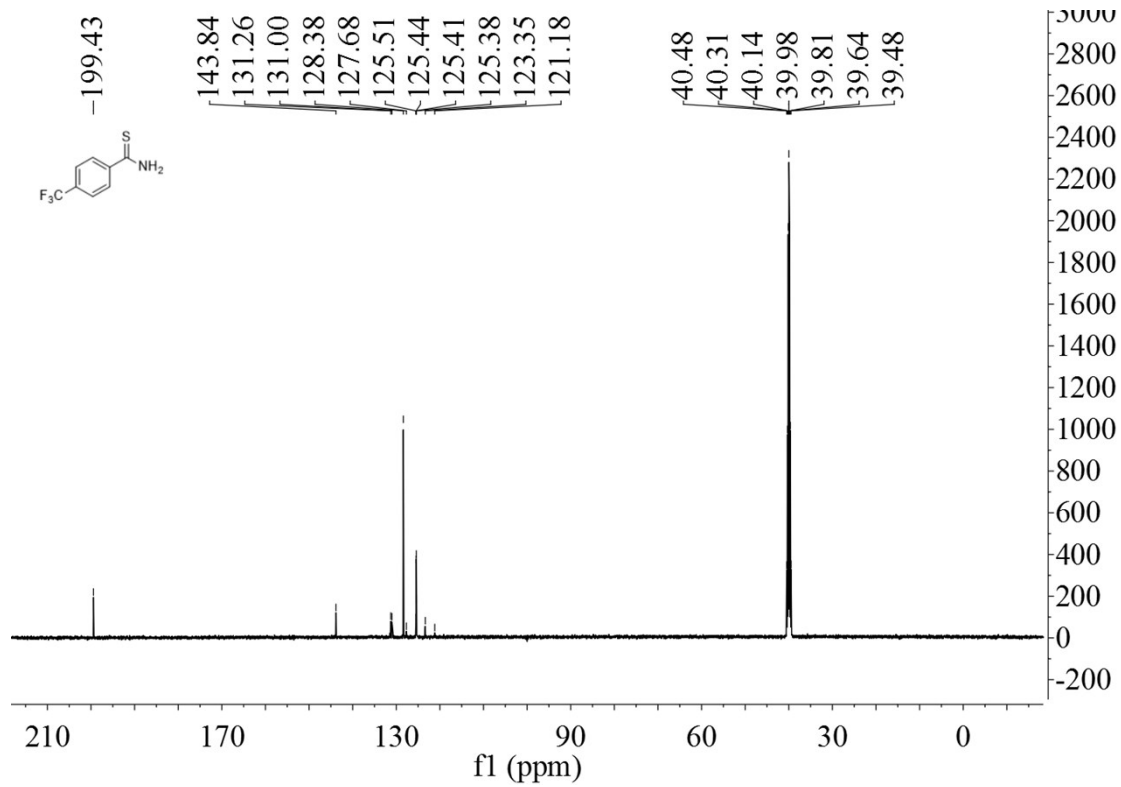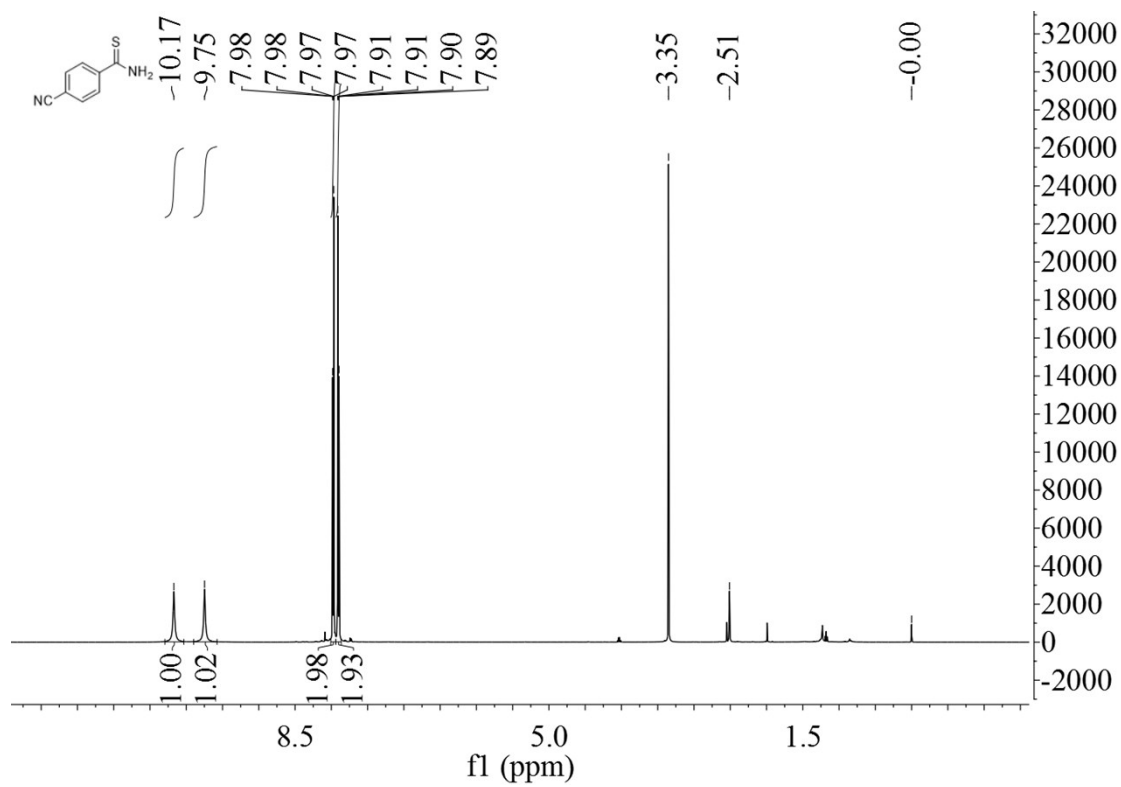

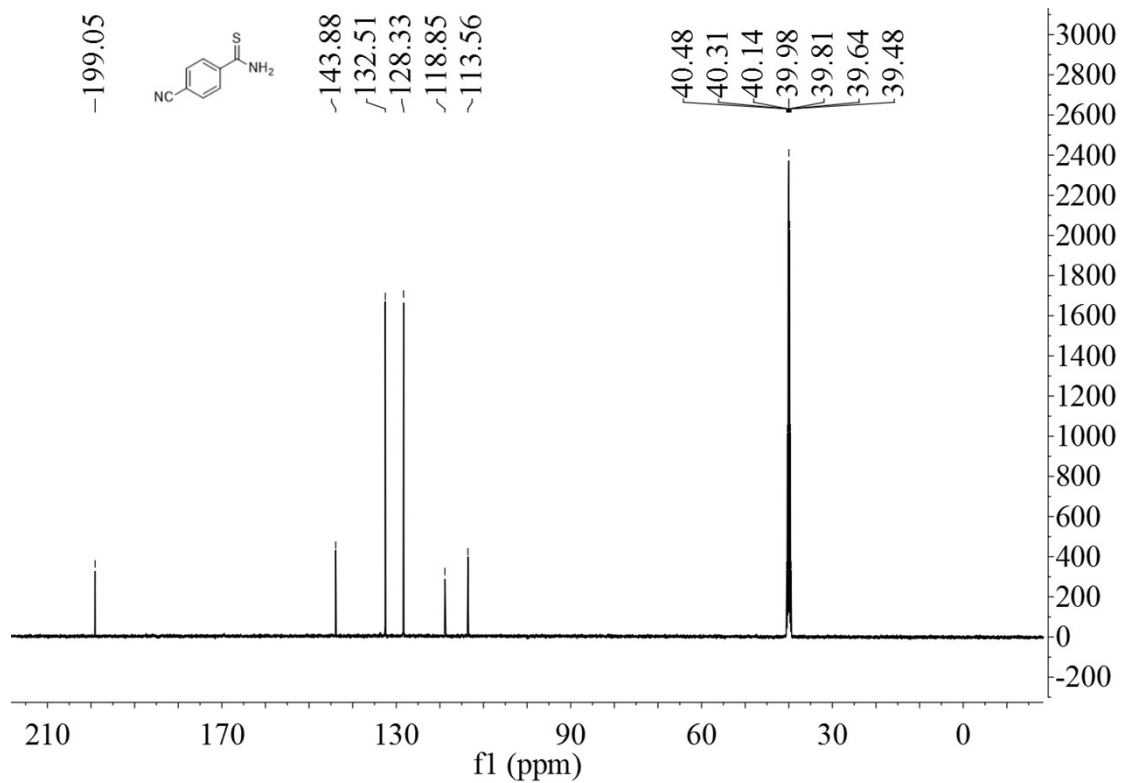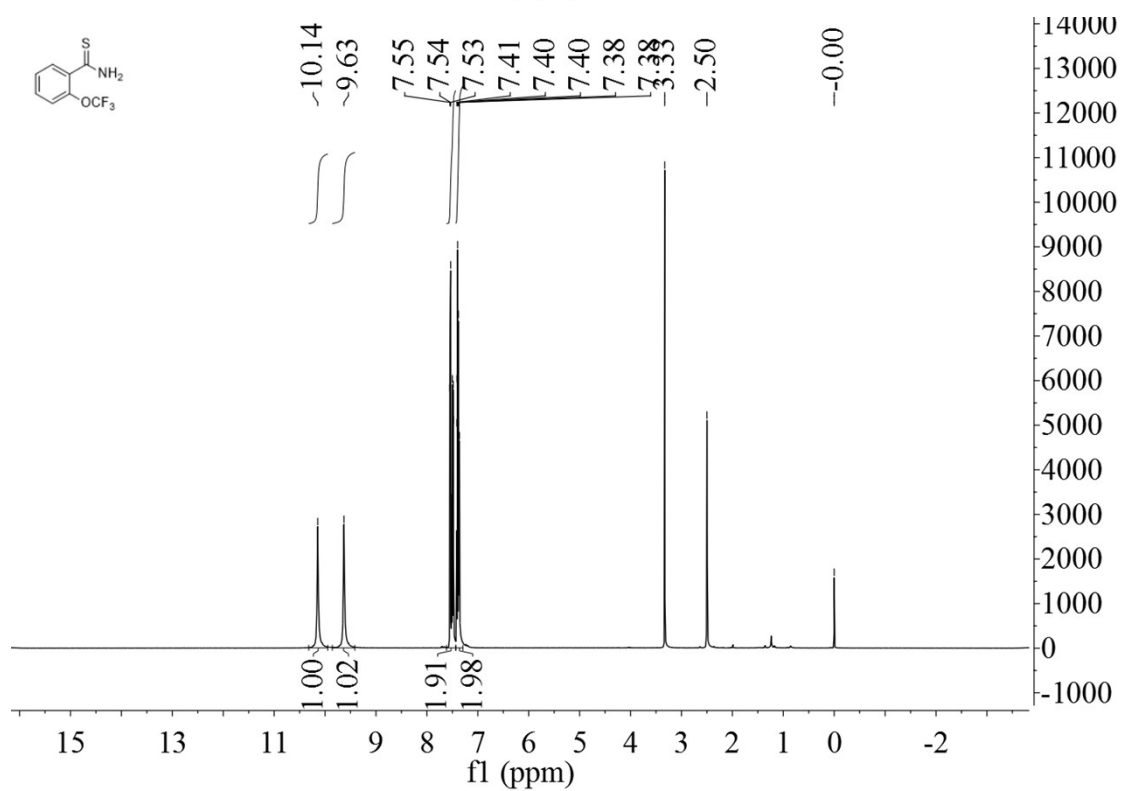

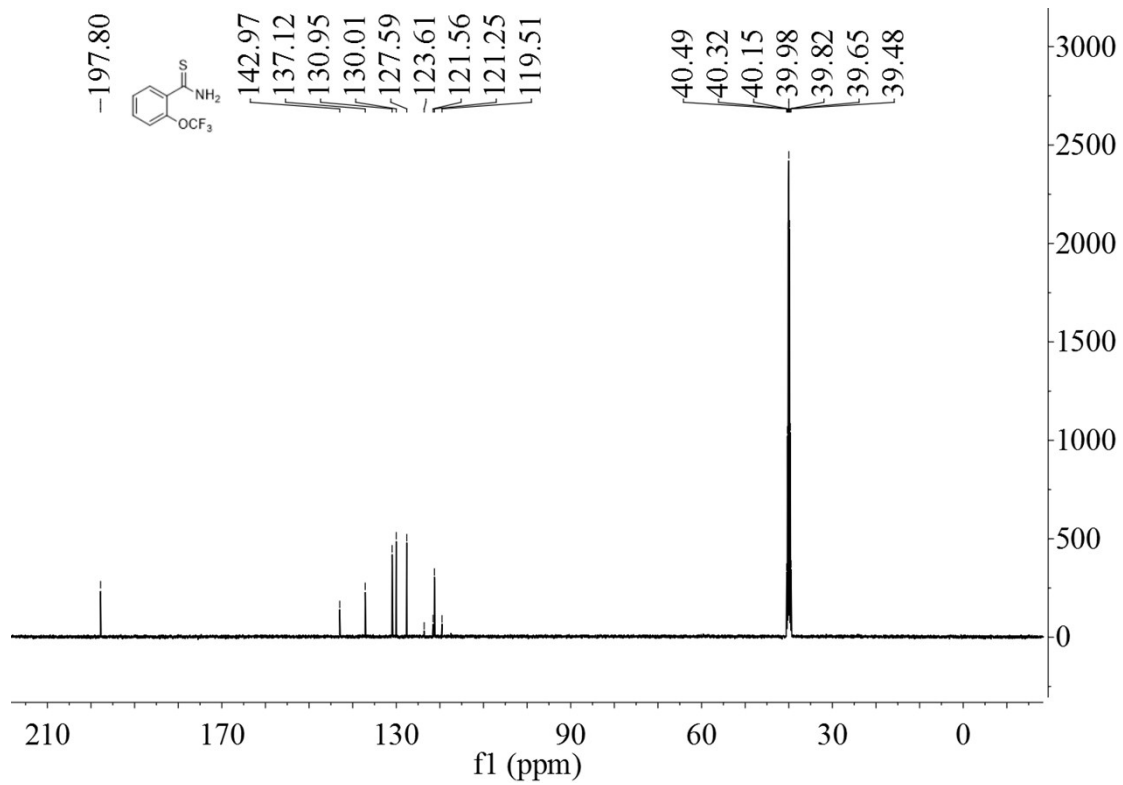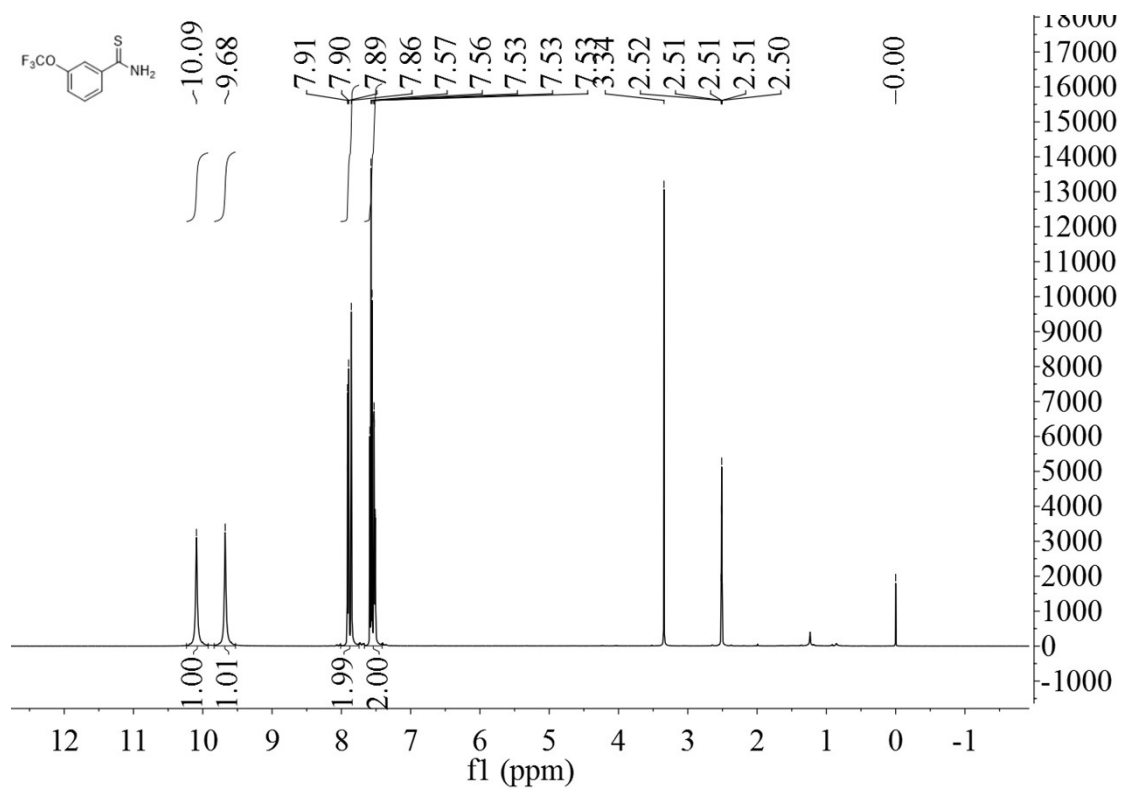

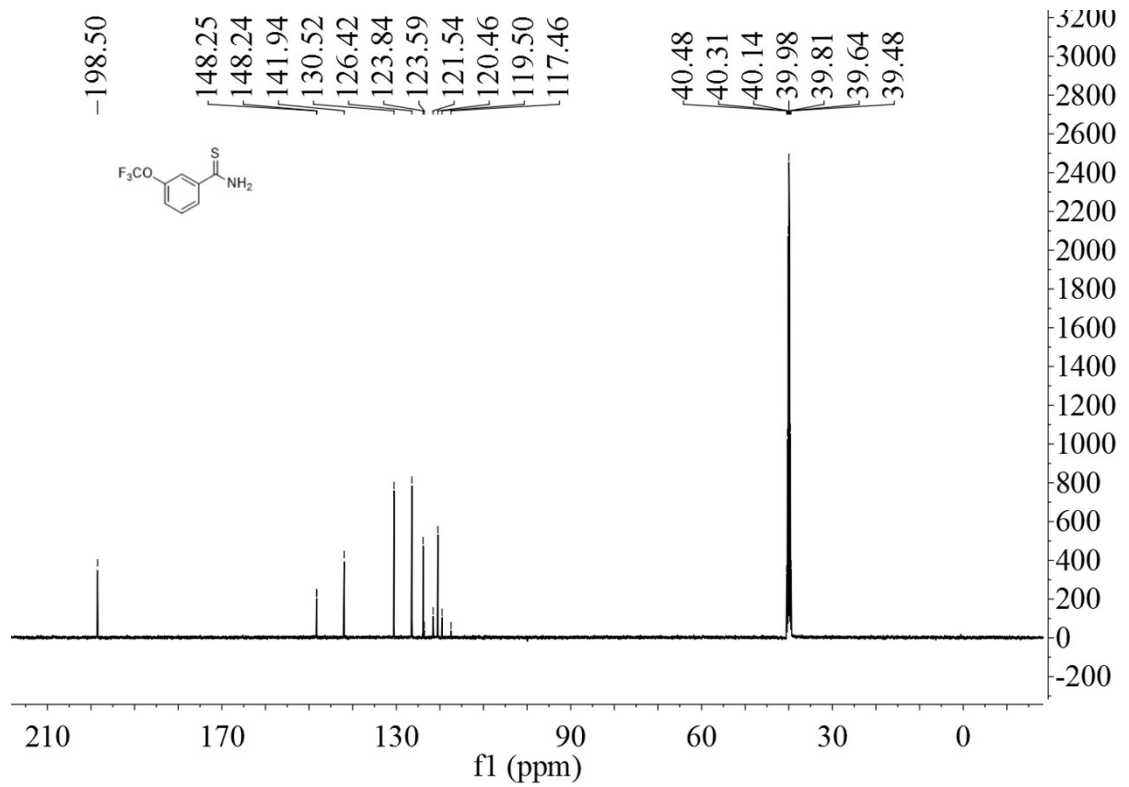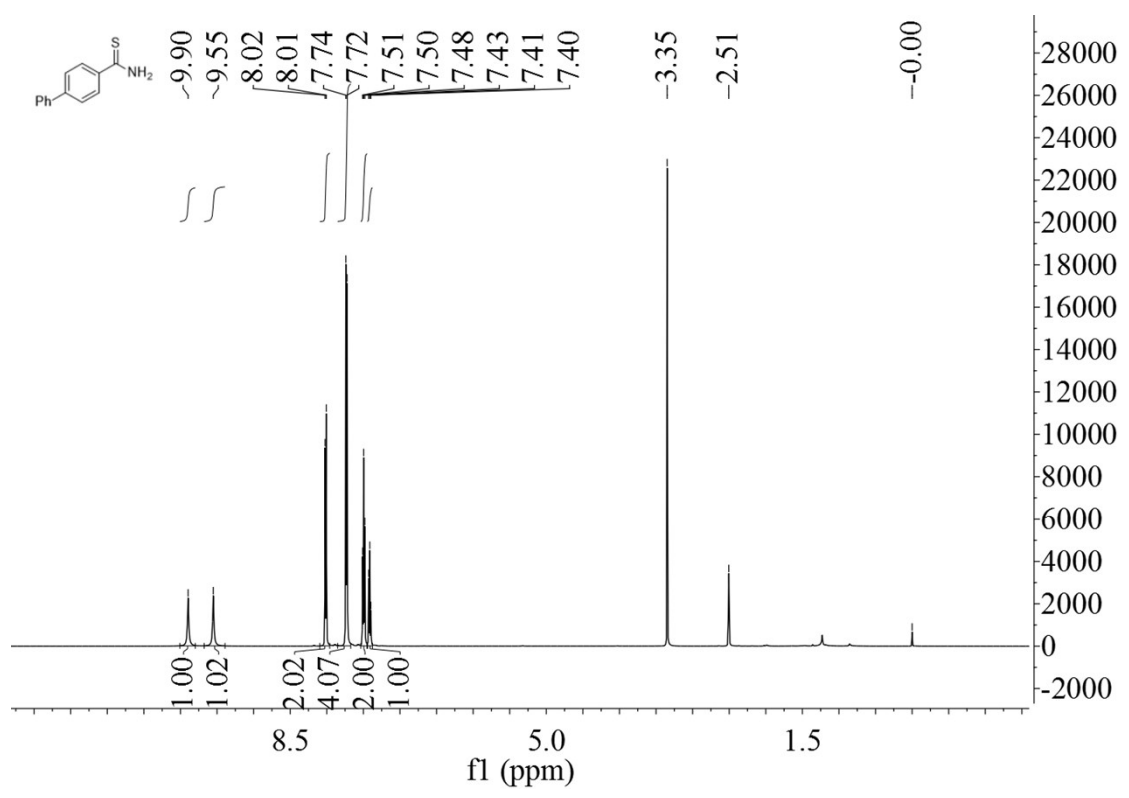

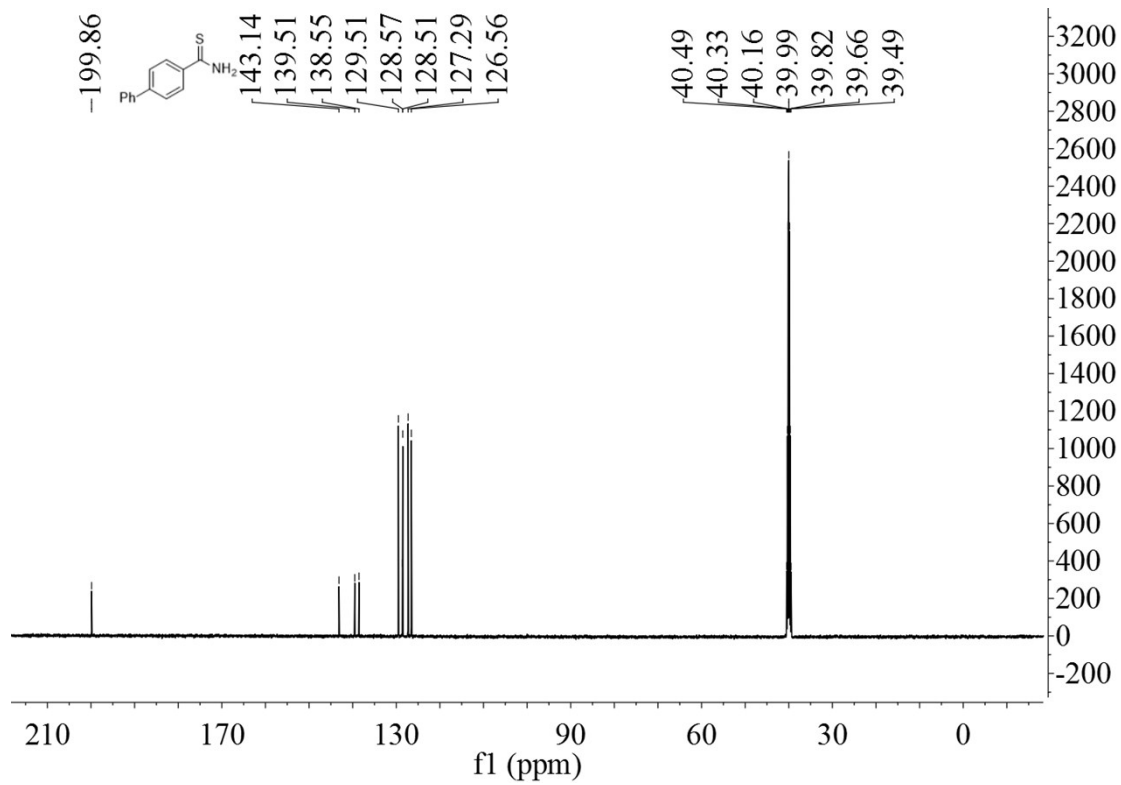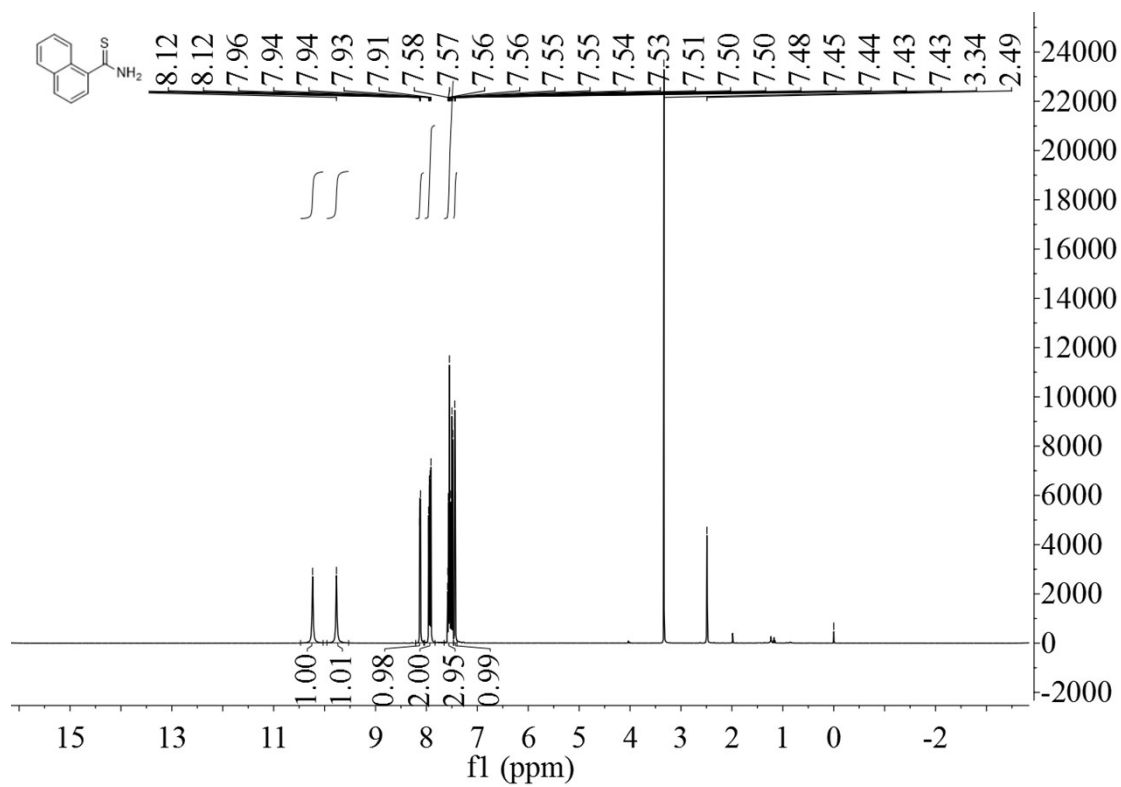

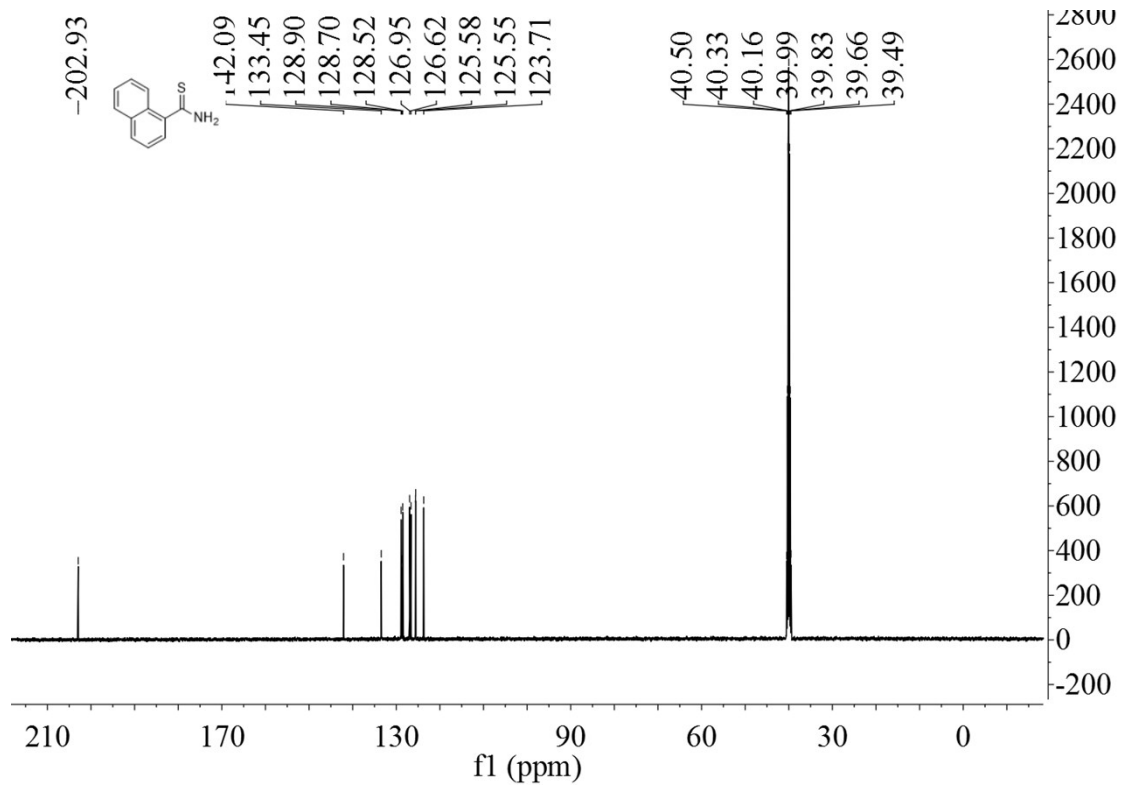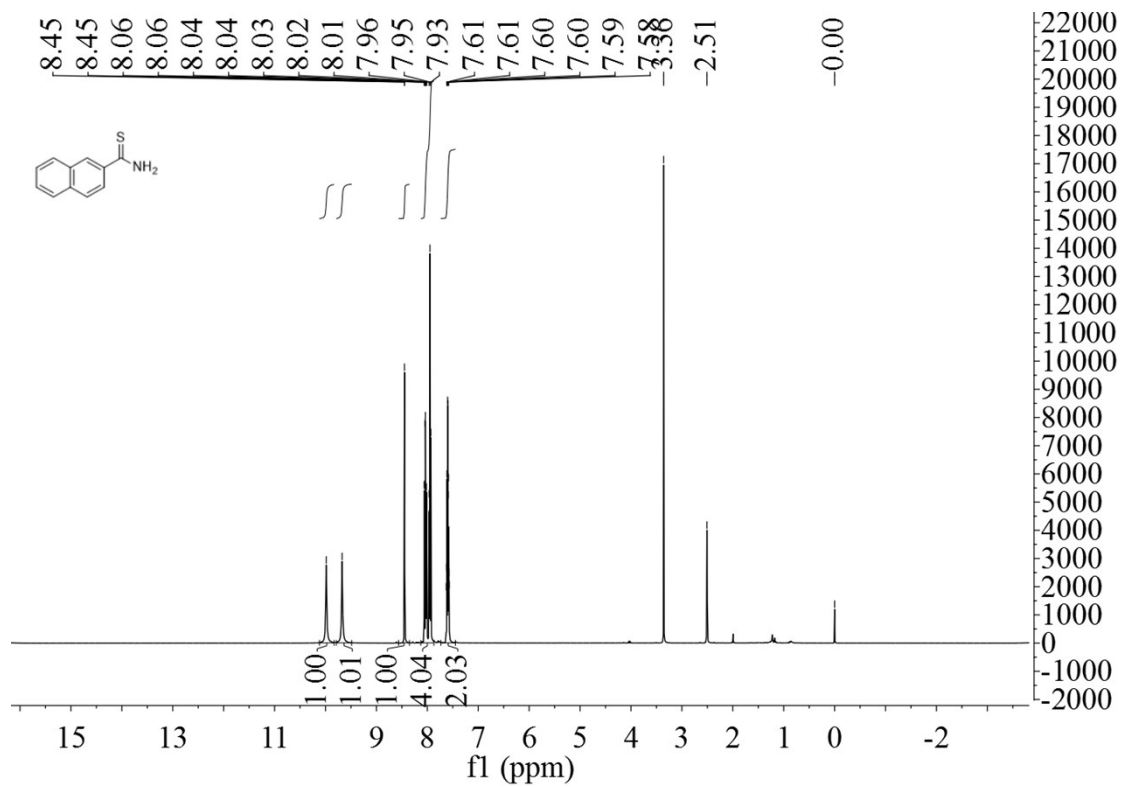



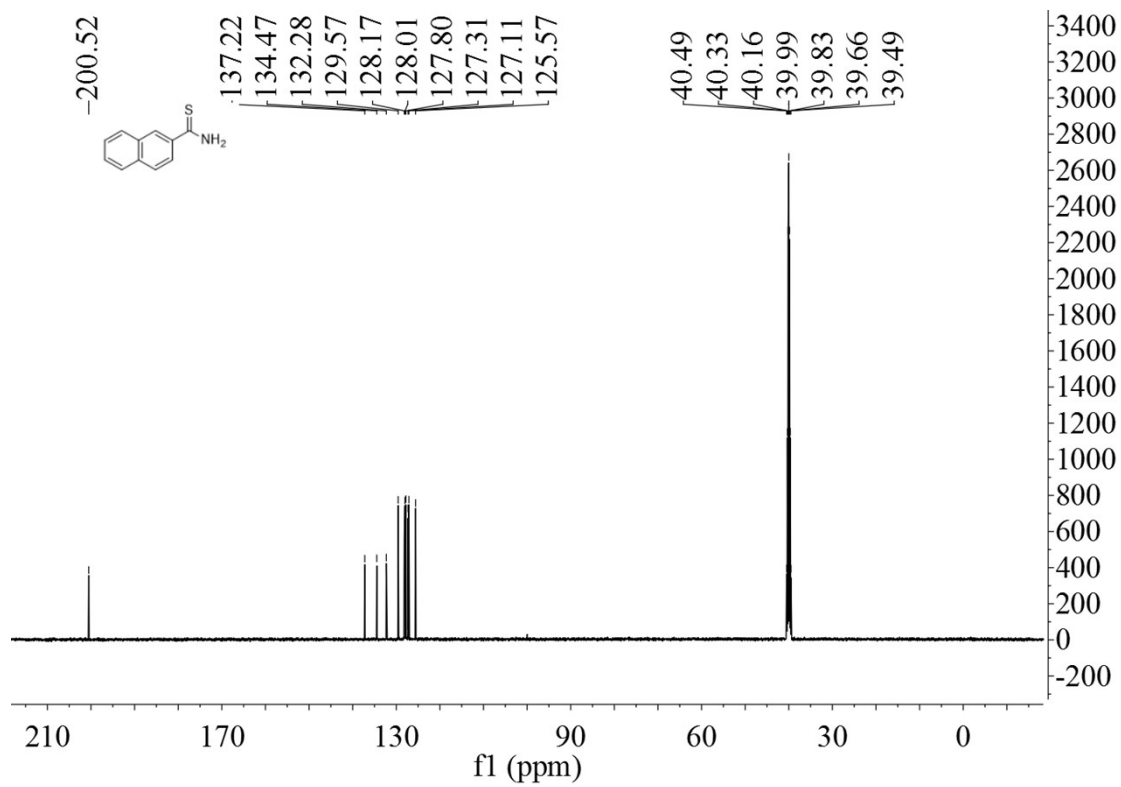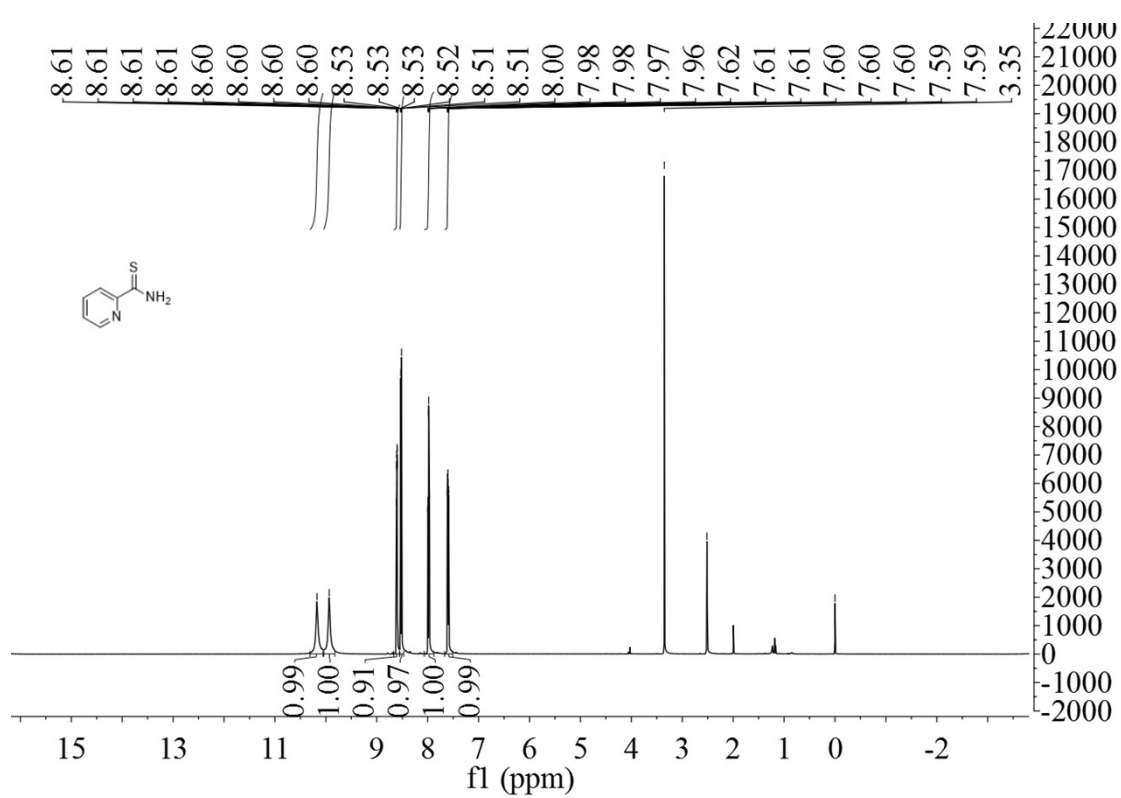

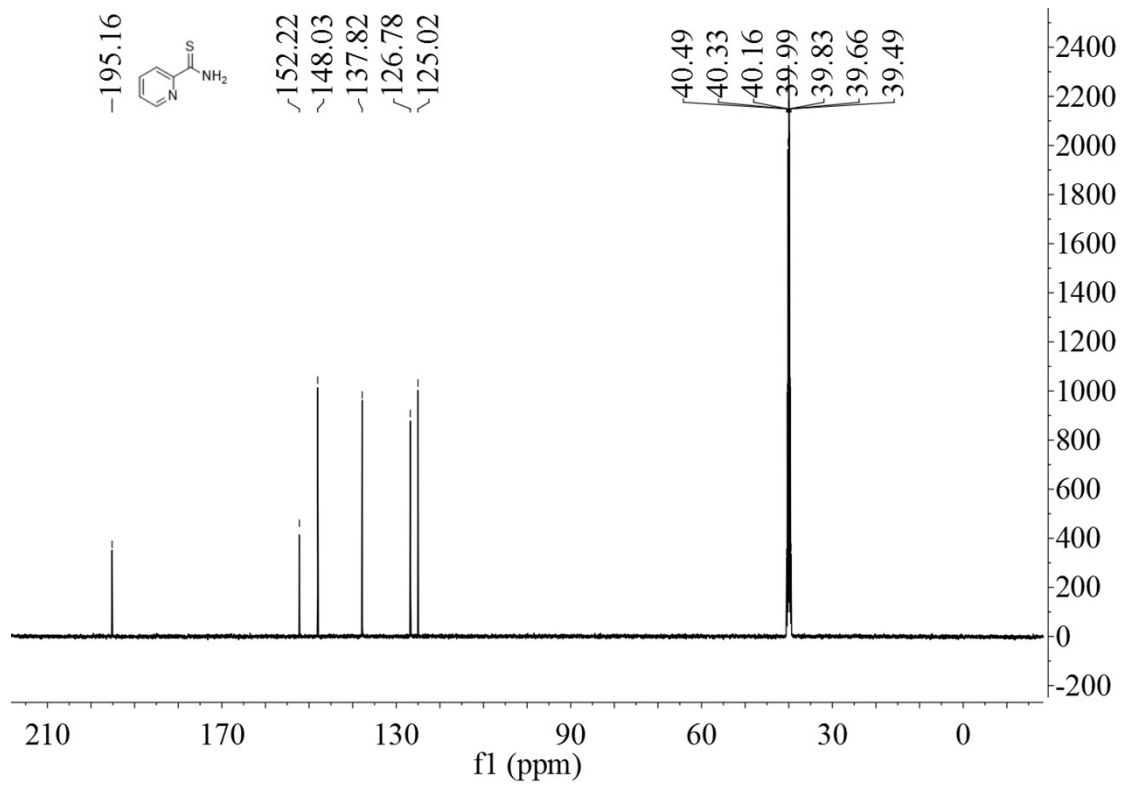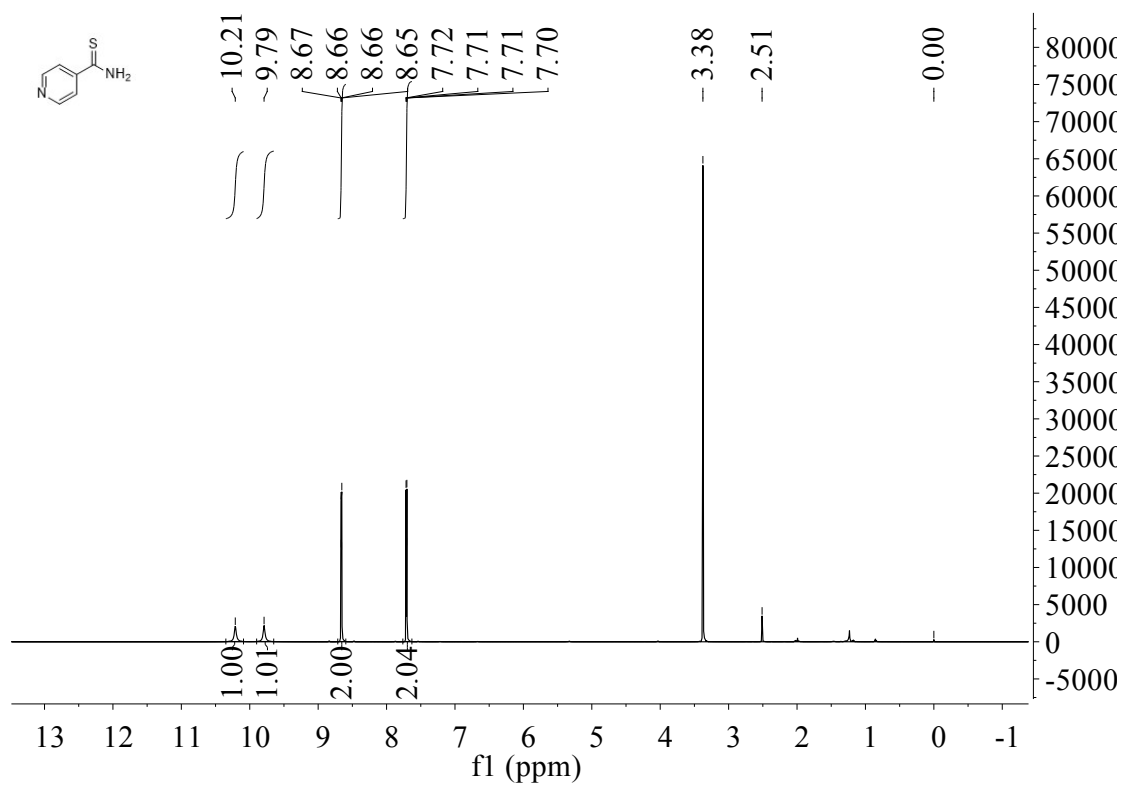

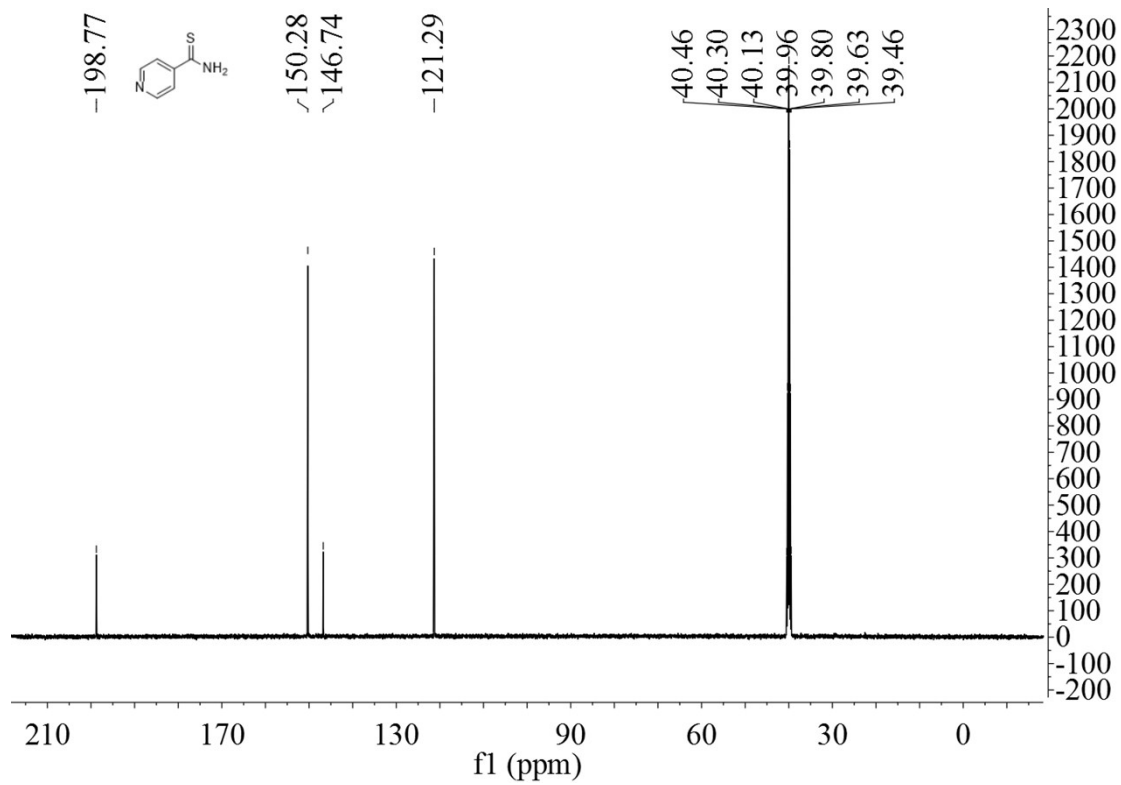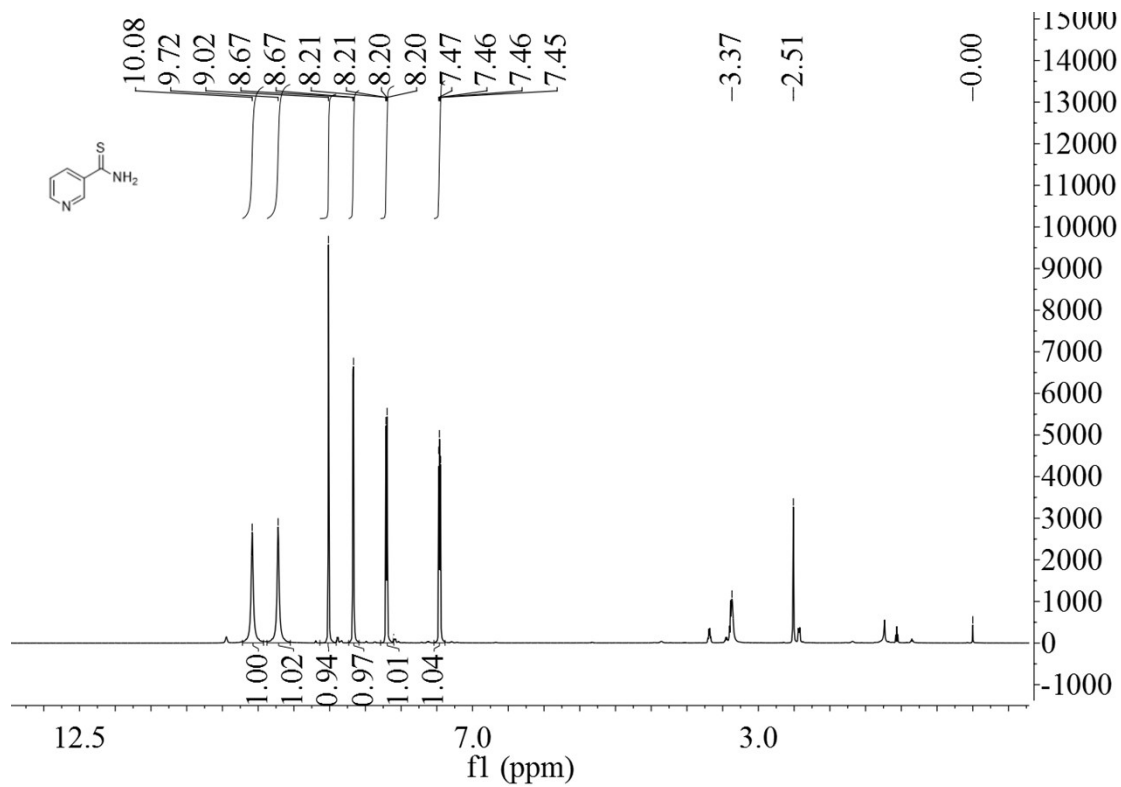

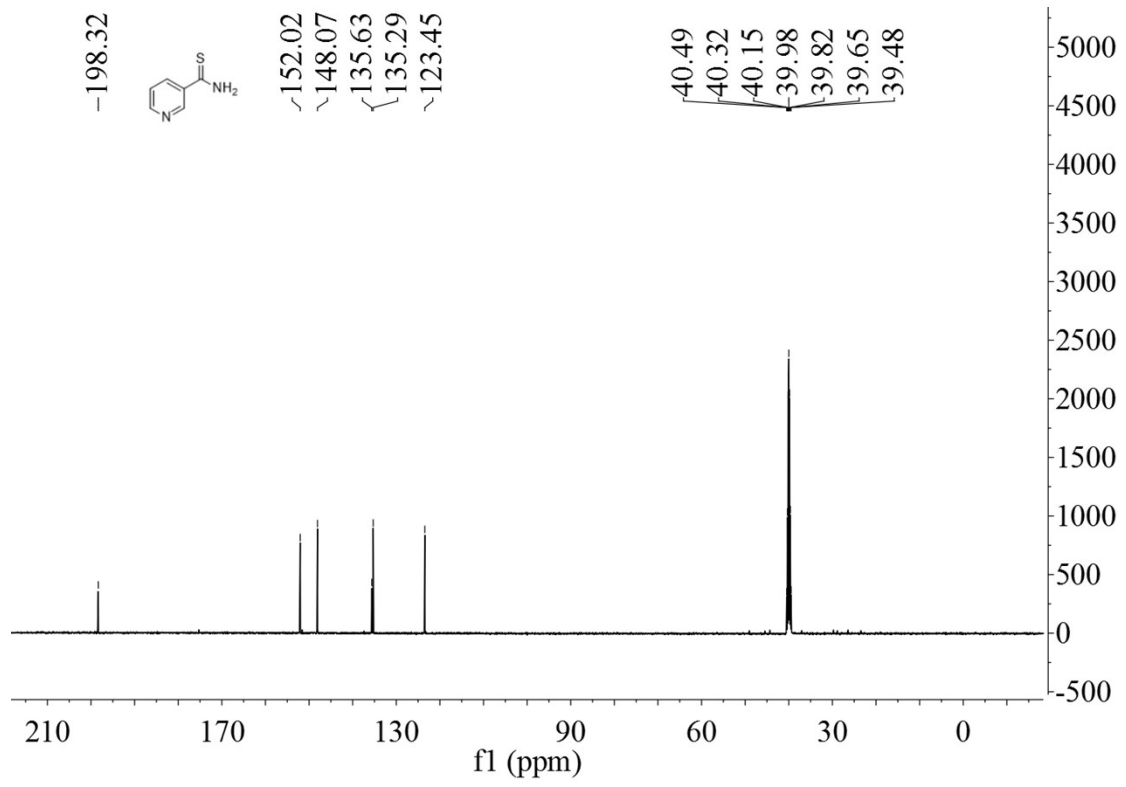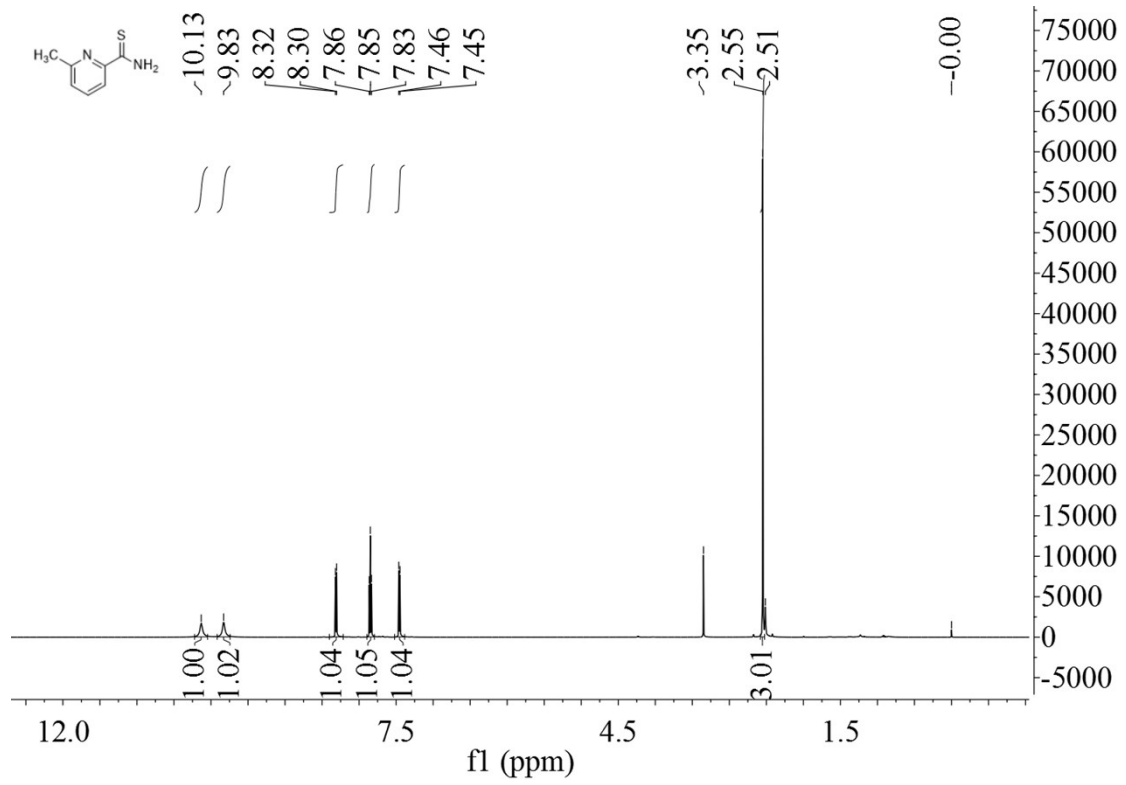

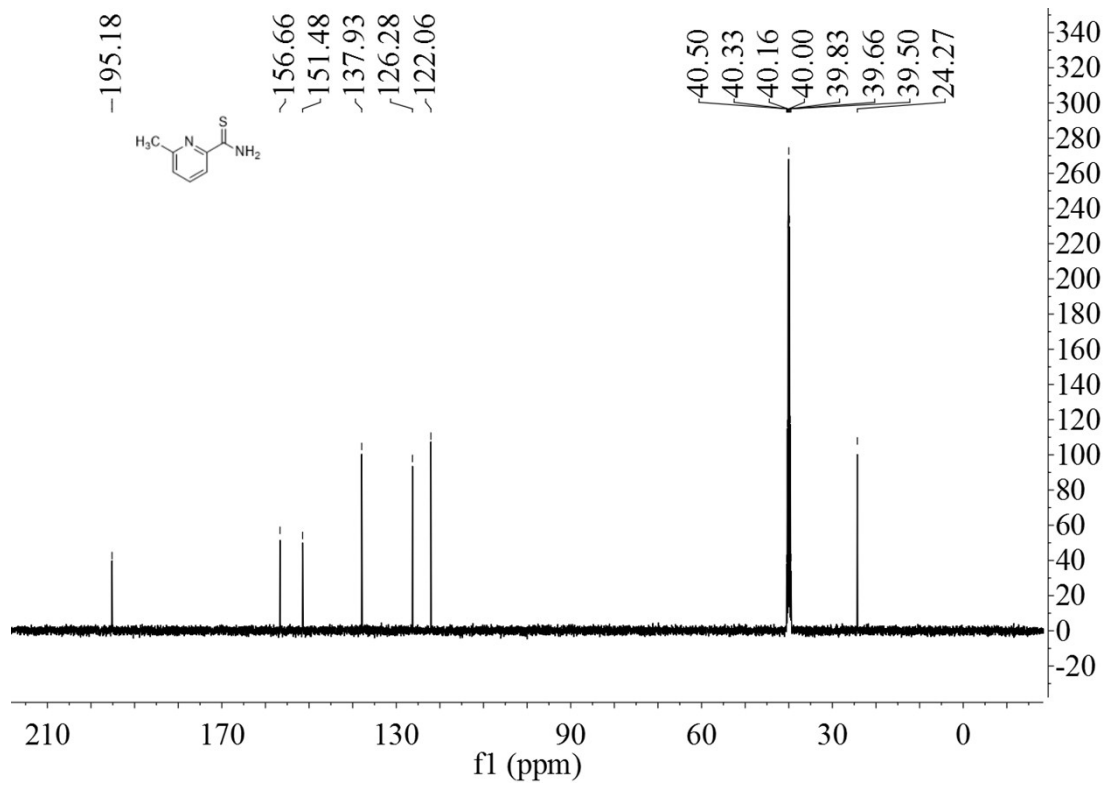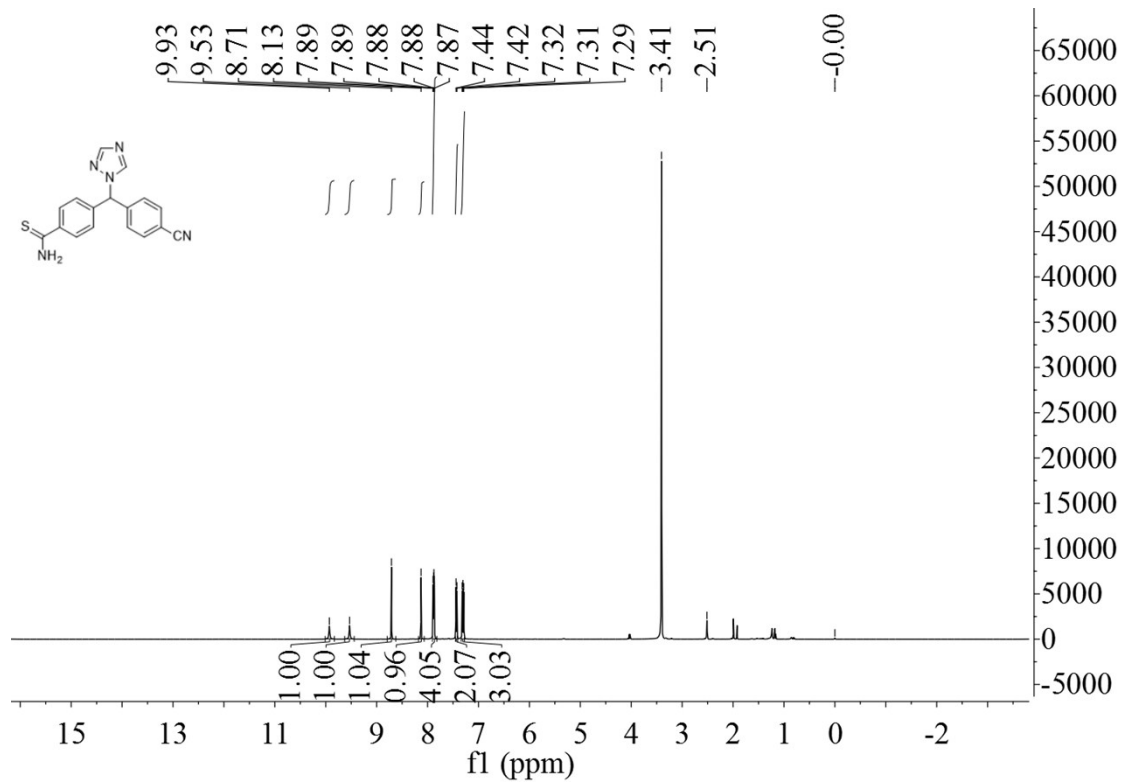

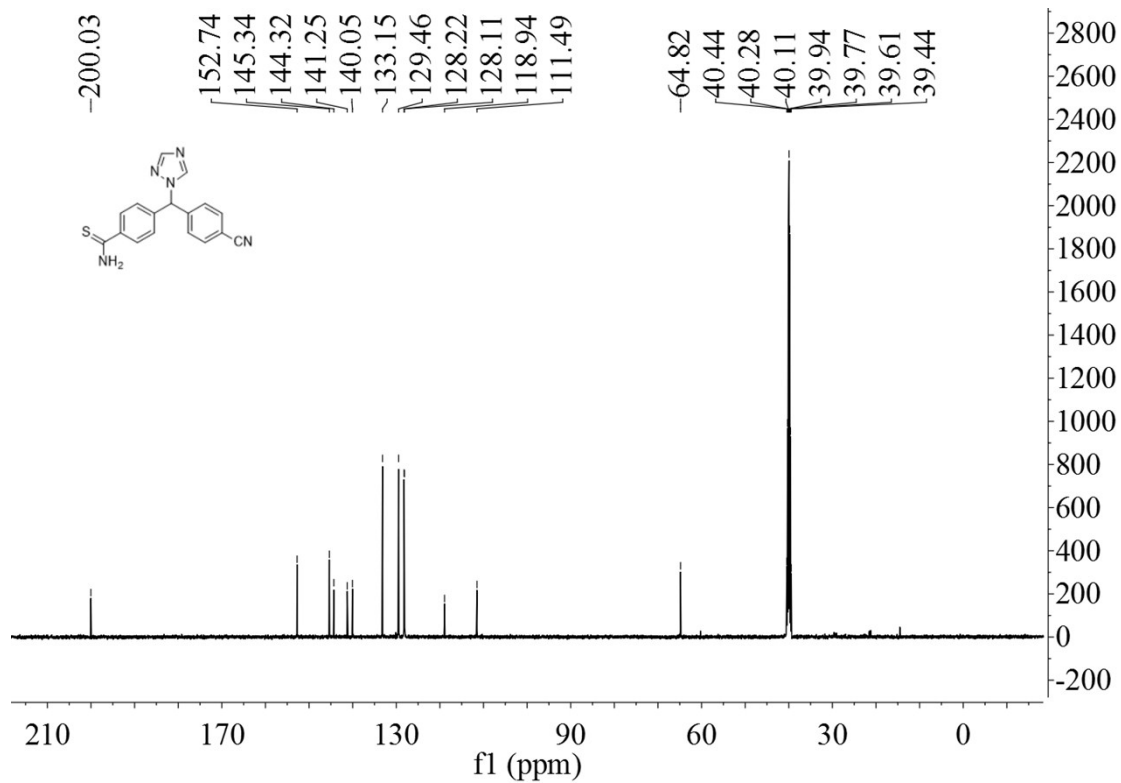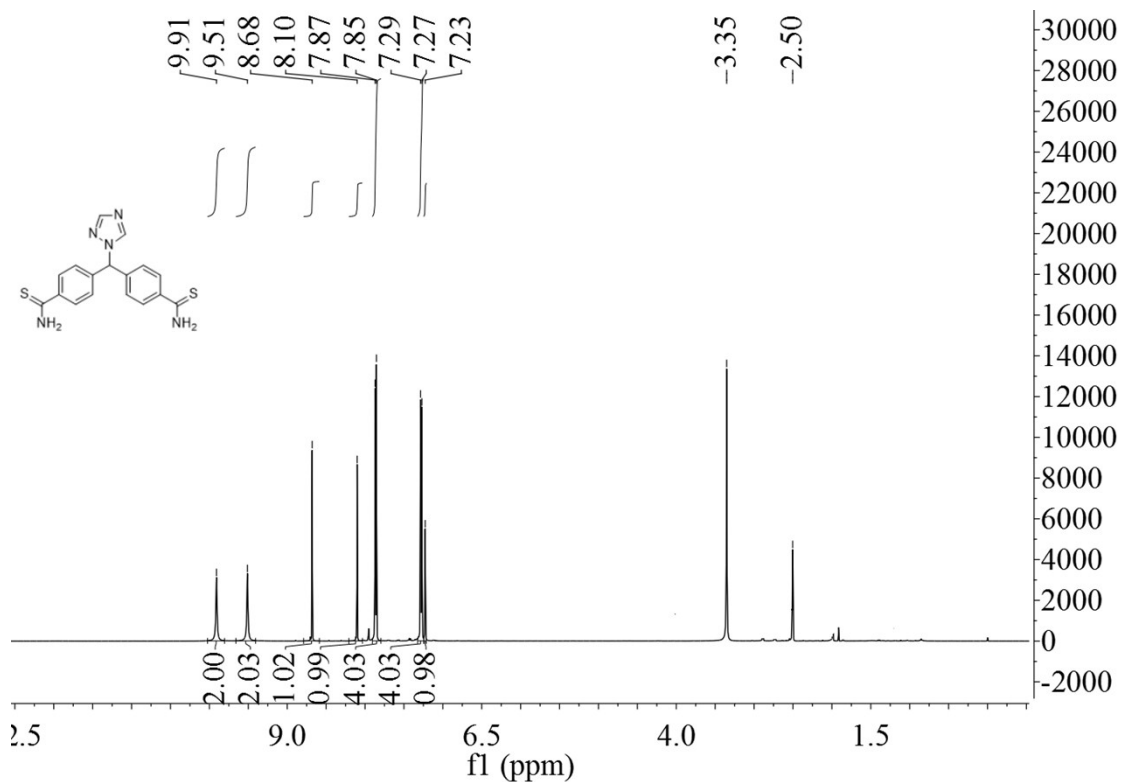

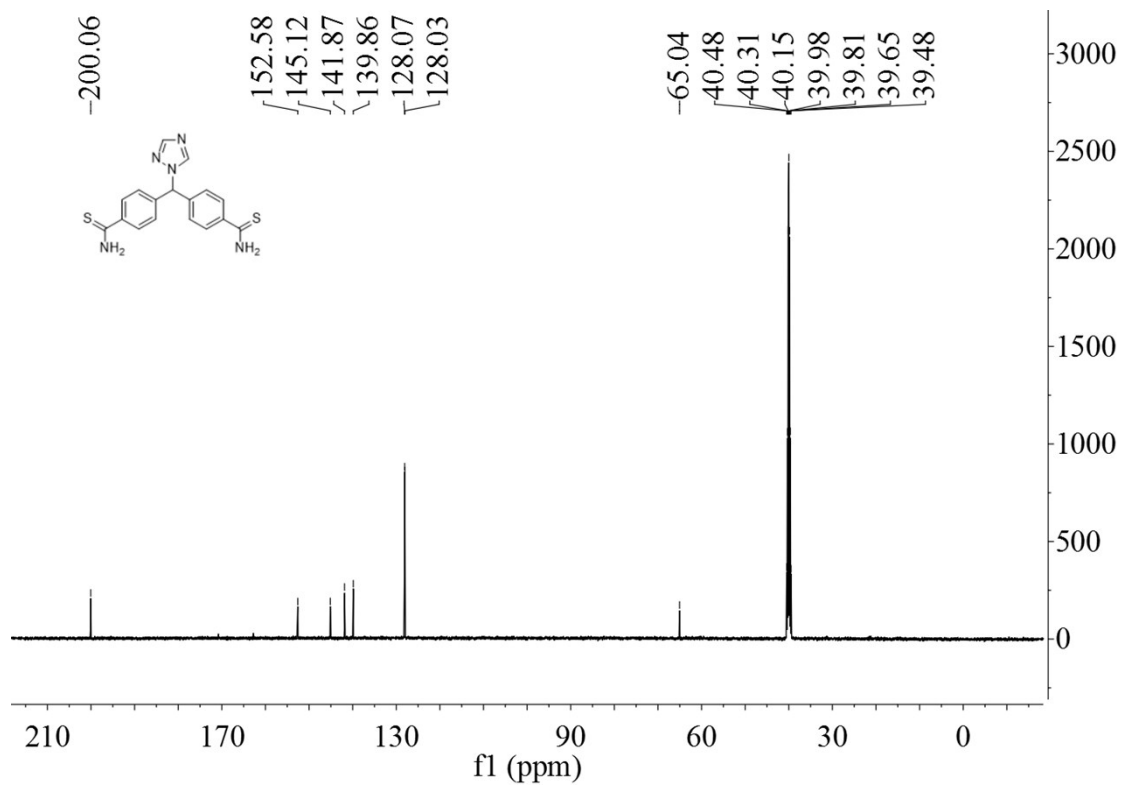

Supplement: c7ra11259a1.pdf [file c7ra11259a1.pdf]
